# Supplementary material for: Establishment of a novel indicator of pyroptosis regulated gene transcription level and its application in pan-cancer
Source: Sci Rep. 2023 Oct 20;13:17911. doi: 10.1038/s41598-023-44700-8 (PMC10589244; doi:10.1038/s41598-023-44700-8)
Supplement: Supplementary file 2 — Supplementary Tables. [file 41598_2023_44700_MOESM2_ESM.xlsx]

## Sheet: Sheet1
sampleID	PPI	TCGA
TCGA-AB-2863-03	0.00939353	LAML
TCGA-AB-2914-03	-1.22157	LAML
TCGA-AB-2967-03	0.983043	LAML
TCGA-AB-2892-03	-1.00594	LAML
TCGA-AB-2862-03	-0.421312	LAML
TCGA-AB-2976-03	1.19777	LAML
TCGA-AB-2877-03	-1.02998	LAML
TCGA-AB-2869-03	-0.189352	LAML
TCGA-AB-2896-03	-0.669477	LAML
TCGA-AB-2985-03	0.224964	LAML
TCGA-AB-2994-03	0.553807	LAML
TCGA-AB-2870-03	1.03339	LAML
TCGA-AB-2981-03	0.354553	LAML
TCGA-AB-2884-03	-0.154499	LAML
TCGA-AB-2998-03	-0.66141	LAML
TCGA-AB-2978-03	-0.41835	LAML
TCGA-AB-2956-03	-1.09782	LAML
TCGA-AB-2808-03	1.02543	LAML
TCGA-AB-3012-03	-0.293634	LAML
TCGA-AB-2841-03	-0.369475	LAML
TCGA-AB-2836-03	2.64754	LAML
TCGA-AB-2894-03	-0.719427	LAML
TCGA-AB-2844-03	0.0602788	LAML
TCGA-AB-2828-03	0.408923	LAML
TCGA-AB-2949-03	0.798533	LAML
TCGA-AB-2955-03	-2.20936	LAML
TCGA-AB-2820-03	-0.280963	LAML
TCGA-AB-3007-03	1.0595	LAML
TCGA-AB-3008-03	-0.226317	LAML
TCGA-AB-2889-03	0.797508	LAML
TCGA-AB-2988-03	-0.880478	LAML
TCGA-AB-2843-03	1.97618	LAML
TCGA-AB-2904-03	1.04057	LAML
TCGA-AB-2847-03	0.785969	LAML
TCGA-AB-2859-03	1.83847	LAML
TCGA-AB-2838-03	1.02194	LAML
TCGA-AB-2826-03	-0.577861	LAML
TCGA-AB-2811-03	1.71789	LAML
TCGA-AB-2925-03	1.97343	LAML
TCGA-AB-2943-03	-0.818428	LAML
TCGA-AB-2825-03	-0.568561	LAML
TCGA-AB-2816-03	-0.565325	LAML
TCGA-AB-2868-03	1.49288	LAML
TCGA-AB-2875-03	1.45699	LAML
TCGA-AB-2821-03	-0.313943	LAML
TCGA-AB-2963-03	1.40383	LAML
TCGA-AB-2972-03	-1.31419	LAML
TCGA-AB-2938-03	-0.0508184	LAML
TCGA-AB-2849-03	-1.32382	LAML
TCGA-AB-2891-03	-0.21256	LAML
TCGA-AB-2932-03	1.05909	LAML
TCGA-AB-2858-03	-0.800891	LAML
TCGA-AB-2901-03	0.14967	LAML
TCGA-AB-2845-03	-0.679579	LAML
TCGA-AB-2935-03	1.31057	LAML
TCGA-AB-2921-03	0.585777	LAML
TCGA-AB-2924-03	0.921681	LAML
TCGA-AB-2874-03	-0.324468	LAML
TCGA-AB-2939-03	0.314009	LAML
TCGA-AB-2846-03	-0.641953	LAML
TCGA-AB-2835-03	0.227608	LAML
TCGA-AB-2822-03	-0.464511	LAML
TCGA-AB-2912-03	0.610814	LAML
TCGA-AB-2878-03	-1.46933	LAML
TCGA-AB-2861-03	0.519786	LAML
TCGA-AB-2954-03	-0.687647	LAML
TCGA-AB-2900-03	0.980497	LAML
TCGA-AB-2942-03	-0.0457757	LAML
TCGA-AB-2866-03	0.879602	LAML
TCGA-AB-2897-03	-0.862911	LAML
TCGA-AB-2879-03	-0.838273	LAML
TCGA-AB-2886-03	0.611458	LAML
TCGA-AB-2983-03	0.0817455	LAML
TCGA-AB-2871-03	1.07699	LAML
TCGA-AB-2999-03	1.89496	LAML
TCGA-AB-2966-03	-2.0078	LAML
TCGA-AB-3000-03	0.591557	LAML
TCGA-AB-2805-03	0.660314	LAML
TCGA-AB-2851-03	-0.11727	LAML
TCGA-AB-2987-03	-0.0576459	LAML
TCGA-AB-2840-03	-0.0231079	LAML
TCGA-AB-2837-03	-0.144471	LAML
TCGA-AB-2940-03	1.53685	LAML
TCGA-AB-2839-03	-1.40213	LAML
TCGA-AB-2812-03	-1.18383	LAML
TCGA-AB-2959-03	0.55387	LAML
TCGA-AB-2991-03	-0.942328	LAML
TCGA-AB-2803-03	-0.479401	LAML
TCGA-AB-2824-03	0.823171	LAML
TCGA-AB-2819-03	-1.2829	LAML
TCGA-AB-2971-03	-0.425002	LAML
TCGA-AB-2990-03	1.66054	LAML
TCGA-AB-2854-03	0.238968	LAML
TCGA-AB-2898-03	-1.41076	LAML
TCGA-AB-2918-03	-0.78177	LAML
TCGA-AB-3009-03	-0.769297	LAML
TCGA-AB-3005-03	0.521012	LAML
TCGA-AB-2928-03	-1.75298	LAML
TCGA-AB-2910-03	-0.649103	LAML
TCGA-AB-2931-03	1.4439	LAML
TCGA-AB-2857-03	0.606987	LAML
TCGA-AB-2899-03	-1.34018	LAML
TCGA-AB-2880-03	0.706253	LAML
TCGA-AB-2817-03	1.03899	LAML
TCGA-AB-2865-03	1.90005	LAML
TCGA-AB-2973-03	-0.522668	LAML
TCGA-AB-2977-03	0.28016	LAML
TCGA-AB-2969-03	1.40958	LAML
TCGA-AB-2908-03	0.730873	LAML
TCGA-AB-2916-03	-0.308424	LAML
TCGA-AB-2848-03	1.20245	LAML
TCGA-AB-2856-03	1.37016	LAML
TCGA-AB-2915-03	0.438549	LAML
TCGA-AB-2881-03	-0.123728	LAML
TCGA-AB-2903-03	-1.3875	LAML
TCGA-AB-2911-03	-0.132597	LAML
TCGA-AB-2934-03	1.81624	LAML
TCGA-AB-2873-03	-0.507902	LAML
TCGA-AB-2860-03	-0.335848	LAML
TCGA-AB-2984-03	-0.891837	LAML
TCGA-AB-2980-03	0.60018	LAML
TCGA-AB-2913-03	0.450201	LAML
TCGA-AB-2885-03	-0.274	LAML
TCGA-AB-2834-03	-0.483575	LAML
TCGA-AB-2876-03	-1.56821	LAML
TCGA-AB-2996-03	-0.645855	LAML
TCGA-AB-2979-03	-1.008	LAML
TCGA-AB-2806-03	0.478782	LAML
TCGA-AB-2867-03	-1.01712	LAML
TCGA-AB-2855-03	-0.760741	LAML
TCGA-AB-2975-03	0.208403	LAML
TCGA-AB-2944-03	0.0420313	LAML
TCGA-AB-2818-03	-0.0150288	LAML
TCGA-AB-2950-03	-1.19749	LAML
TCGA-AB-2952-03	0.0911896	LAML
TCGA-AB-2895-03	-1.10953	LAML
TCGA-AB-2917-03	-1.03118	LAML
TCGA-AB-2948-03	0.535753	LAML
TCGA-AB-2883-03	0.129154	LAML
TCGA-AB-2887-03	-1.56832	LAML
TCGA-AB-3006-03	0.718521	LAML
TCGA-AB-2815-03	0.308093	LAML
TCGA-AB-2823-03	-1.01544	LAML
TCGA-AB-2986-03	-0.143536	LAML
TCGA-AB-2853-03	0.384642	LAML
TCGA-AB-2993-03	-1.38362	LAML
TCGA-AB-2842-03	-0.10639	LAML
TCGA-AB-2965-03	0.802897	LAML
TCGA-AB-2830-03	-0.610874	LAML
TCGA-AB-2941-03	0.288129	LAML
TCGA-AB-2832-03	-0.31376	LAML
TCGA-AB-2872-03	-1.01994	LAML
TCGA-AB-3011-03	-2.37569	LAML
TCGA-AB-2813-03	1.01432	LAML
TCGA-AB-2936-03	-0.950356	LAML
TCGA-AB-2929-03	-0.275687	LAML
TCGA-AB-2810-03	-0.295376	LAML
TCGA-AB-2927-03	-0.370628	LAML
TCGA-AB-2814-03	-2.02932	LAML
TCGA-AB-2946-03	1.63819	LAML
TCGA-AB-2970-03	-1.1163	LAML
TCGA-AB-2890-03	1.56642	LAML
TCGA-AB-2995-03	0.6841	LAML
TCGA-AB-3002-03	-0.370996	LAML
TCGA-AB-2919-03	-0.901694	LAML
TCGA-AB-2893-03	0.967764	LAML
TCGA-AB-2882-03	-0.0516918	LAML
TCGA-AB-2930-03	-0.036551	LAML
TCGA-AB-2920-03	-0.0233392	LAML
TCGA-AB-2933-03	1.45884	LAML
TCGA-AB-2833-03	1.95879	LAML
TCGA-AB-2964-03	-2.05297	LAML
TCGA-AB-2937-03	-1.43	LAML
TCGA-OR-A5K3-01	0.0900773	ACC
TCGA-OR-A5J2-01	-0.666623	ACC
TCGA-OR-A5LN-01	0.53893	ACC
TCGA-OR-A5KY-01	-0.0234702	ACC
TCGA-OR-A5LG-01	0.484284	ACC
TCGA-OR-A5JC-01	0.831548	ACC
TCGA-OR-A5JV-01	1.00894	ACC
TCGA-OU-A5PI-01	-1.4413	ACC
TCGA-OR-A5KO-01	-1.80052	ACC
TCGA-OR-A5JP-01	0.650276	ACC
TCGA-OR-A5L9-01	0.352486	ACC
TCGA-OR-A5JO-01	0.986036	ACC
TCGA-OR-A5JX-01	-0.160234	ACC
TCGA-PA-A5YG-01	0.446019	ACC
TCGA-OR-A5LD-01	0.960756	ACC
TCGA-OR-A5LL-01	-1.63424	ACC
TCGA-OR-A5K8-01	-0.761718	ACC
TCGA-OR-A5KW-01	-0.963958	ACC
TCGA-OR-A5J9-01	-0.273636	ACC
TCGA-OR-A5L8-01	-0.820804	ACC
TCGA-OR-A5J6-01	0.24994	ACC
TCGA-OR-A5JJ-01	1.04128	ACC
TCGA-OR-A5LJ-01	0.226228	ACC
TCGA-OR-A5JM-01	-1.16553	ACC
TCGA-PK-A5HB-01	-1.42789	ACC
TCGA-OR-A5JF-01	-1.16601	ACC
TCGA-OR-A5K9-01	-1.11005	ACC
TCGA-OR-A5LM-01	0.318228	ACC
TCGA-OR-A5KZ-01	0.518105	ACC
TCGA-PK-A5H8-01	0.452971	ACC
TCGA-OR-A5J7-01	-1.10757	ACC
TCGA-P6-A5OG-01	1.73484	ACC
TCGA-OR-A5K1-01	0.116523	ACC
TCGA-OR-A5LT-01	0.312562	ACC
TCGA-OR-A5L6-01	1.39267	ACC
TCGA-OR-A5JW-01	-0.861738	ACC
TCGA-OR-A5LE-01	-0.660892	ACC
TCGA-OR-A5JA-01	-1.08508	ACC
TCGA-OR-A5J5-01	0.754621	ACC
TCGA-OR-A5JZ-01	0.487893	ACC
TCGA-OR-A5JI-01	0.547604	ACC
TCGA-OR-A5LA-01	0.68218	ACC
TCGA-PK-A5HA-01	1.33992	ACC
TCGA-OR-A5JQ-01	0.520005	ACC
TCGA-OR-A5JE-01	0.76062	ACC
TCGA-OR-A5KU-01	-0.705054	ACC
TCGA-OR-A5LB-01	-1.01187	ACC
TCGA-OR-A5K5-01	-0.208451	ACC
TCGA-OR-A5J8-01	2.64236	ACC
TCGA-OR-A5L5-01	0.518803	ACC
TCGA-OR-A5J3-01	-0.92042	ACC
TCGA-OR-A5LS-01	-0.907727	ACC
TCGA-OR-A5LH-01	-0.407379	ACC
TCGA-OR-A5JL-01	-0.582929	ACC
TCGA-OR-A5JG-01	-0.594432	ACC
TCGA-OR-A5LO-01	-2.02424	ACC
TCGA-OR-A5L3-01	-0.422144	ACC
TCGA-OR-A5LC-01	-0.208299	ACC
TCGA-P6-A5OF-01	-0.983371	ACC
TCGA-OR-A5KX-01	-0.712023	ACC
TCGA-OR-A5K4-01	-0.362703	ACC
TCGA-OR-A5J1-01	1.25841	ACC
TCGA-OR-A5JT-01	-0.288009	ACC
TCGA-OR-A5JB-01	3.31223	ACC
TCGA-OR-A5JY-01	-0.41913	ACC
TCGA-OR-A5JR-01	0.211328	ACC
TCGA-OR-A5KV-01	0.00845672	ACC
TCGA-OR-A5K6-01	-0.159967	ACC
TCGA-OR-A5JS-01	-1.22712	ACC
TCGA-OR-A5LP-01	-0.624892	ACC
TCGA-OR-A5LK-01	1.87342	ACC
TCGA-OR-A5JK-01	1.71436	ACC
TCGA-OR-A5JD-01	0.436839	ACC
TCGA-OR-A5L4-01	-0.526153	ACC
TCGA-OR-A5KT-01	0.866044	ACC
TCGA-PK-A5H9-01	-0.239612	ACC
TCGA-OR-A5K0-01	0.0194029	ACC
TCGA-MV-A51V-01	-0.239969	BLCA
TCGA-FD-A3SR-01	-0.687066	BLCA
TCGA-DK-A6B0-01	1.42518	BLCA
TCGA-FD-A5BS-01	3.22456	BLCA
TCGA-DK-A1AD-01	-0.116361	BLCA
TCGA-XF-AAMQ-01	-0.258932	BLCA
TCGA-FT-A3EE-01	-1.80908	BLCA
TCGA-ZF-AA4T-01	-0.222398	BLCA
TCGA-E7-A3X6-01	1.35681	BLCA
TCGA-GU-A762-01	1.27155	BLCA
TCGA-FD-A43S-01	0.639161	BLCA
TCGA-XF-A8HE-01	0.774107	BLCA
TCGA-BT-A42F-01	2.23752	BLCA
TCGA-G2-A3IB-01	0.77853	BLCA
TCGA-CU-A3KJ-01	-0.12915	BLCA
TCGA-DK-A3IS-01	0.0949932	BLCA
TCGA-E5-A4U1-01	0.664044	BLCA
TCGA-XF-A8HF-01	0.23185	BLCA
TCGA-KQ-A41P-01	-0.242253	BLCA
TCGA-BL-A13I-01	-0.70879	BLCA
TCGA-ZF-AA4W-01	0.201897	BLCA
TCGA-UY-A9PA-01	1.42969	BLCA
TCGA-BT-A20N-11	-1.75939	BLCA
TCGA-E5-A2PC-01	-0.778718	BLCA
TCGA-UY-A9PE-01	-0.619419	BLCA
TCGA-XF-A9SV-01	-0.685072	BLCA
TCGA-E7-A6MF-01	-0.283652	BLCA
TCGA-ZF-AA56-01	-1.33062	BLCA
TCGA-DK-AA6X-01	0.568052	BLCA
TCGA-ZF-A9R9-01	0.932611	BLCA
TCGA-DK-AA6S-01	0.81814	BLCA
TCGA-KQ-A41S-01	-0.836333	BLCA
TCGA-YF-AA3M-01	0.0510967	BLCA
TCGA-CF-A7I0-01	-0.619256	BLCA
TCGA-XF-A9T8-01	1.17998	BLCA
TCGA-CU-A0YR-01	0.857981	BLCA
TCGA-GC-A3YS-01	1.35849	BLCA
TCGA-K4-A54R-11	-0.108887	BLCA
TCGA-ZF-AA4N-01	0.95683	BLCA
TCGA-XF-AAMG-01	-0.477998	BLCA
TCGA-GC-A3RC-01	1.14634	BLCA
TCGA-CF-A8HY-01	-0.123312	BLCA
TCGA-ZF-A9RL-01	-0.320046	BLCA
TCGA-XF-A9T0-01	0.982244	BLCA
TCGA-UY-A78M-01	-0.674492	BLCA
TCGA-GC-A4ZW-01	0.218265	BLCA
TCGA-K4-A4AC-01	1.40675	BLCA
TCGA-G2-A2ES-01	0.890634	BLCA
TCGA-FJ-A871-01	-0.0547563	BLCA
TCGA-GD-A3OP-01	-0.958761	BLCA
TCGA-FD-A3SL-01	-0.173401	BLCA
TCGA-XF-A9T3-01	-0.920422	BLCA
TCGA-ZF-AA4V-01	1.03077	BLCA
TCGA-GC-A3BM-11	0.715701	BLCA
TCGA-K4-A5RI-11	0.0334498	BLCA
TCGA-XF-AAMW-01	-0.790711	BLCA
TCGA-G2-A2EO-01	0.937723	BLCA
TCGA-XF-A8HH-01	-1.9708	BLCA
TCGA-FD-A3B7-01	0.43468	BLCA
TCGA-K4-A3WU-01	-0.126733	BLCA
TCGA-CF-A47V-01	1.25743	BLCA
TCGA-DK-A3X1-01	-1.0573	BLCA
TCGA-4Z-AA81-01	1.12999	BLCA
TCGA-CF-A3MG-01	-0.814232	BLCA
TCGA-S5-AA26-01	-0.181662	BLCA
TCGA-ZF-A9R4-01	-0.0697533	BLCA
TCGA-GC-A3OO-01	0.414124	BLCA
TCGA-YC-A9TC-01	0.201191	BLCA
TCGA-YF-AA3L-01	-0.792695	BLCA
TCGA-XF-A9SJ-01	1.38638	BLCA
TCGA-ZF-A9R0-01	0.493739	BLCA
TCGA-BT-A42C-01	-0.285662	BLCA
TCGA-GU-A42P-01	-1.18761	BLCA
TCGA-2F-A9KP-01	-0.606561	BLCA
TCGA-CU-A3QU-01	-0.449175	BLCA
TCGA-DK-AA6Q-01	-0.847138	BLCA
TCGA-BT-A20P-01	-1.11277	BLCA
TCGA-ZF-A9RN-01	-1.08286	BLCA
TCGA-GV-A3QI-01	-1.73238	BLCA
TCGA-FD-A5BU-01	0.308644	BLCA
TCGA-FD-A3NA-01	0.086868	BLCA
TCGA-DK-AA76-01	-1.57973	BLCA
TCGA-DK-A1AA-01	-0.436684	BLCA
TCGA-CU-A0YR-11	-1.09654	BLCA
TCGA-FD-A3B3-01	0.454609	BLCA
TCGA-FD-A6TF-01	-1.04665	BLCA
TCGA-BT-A20W-01	0.590726	BLCA
TCGA-GU-A767-01	0.804496	BLCA
TCGA-DK-A6B2-01	-0.0137548	BLCA
TCGA-XF-A9T5-01	0.215753	BLCA
TCGA-GC-A3RB-01	-0.457837	BLCA
TCGA-XF-AAME-01	0.474916	BLCA
TCGA-FD-A6TE-01	-0.176496	BLCA
TCGA-BT-A20O-01	1.87512	BLCA
TCGA-E7-A6ME-01	0.37738	BLCA
TCGA-XF-AAMJ-01	-0.47308	BLCA
TCGA-CF-A1HR-01	0.407981	BLCA
TCGA-CF-A9FL-01	-0.441333	BLCA
TCGA-H4-A2HO-01	-0.392318	BLCA
TCGA-FJ-A3Z7-01	-0.17909	BLCA
TCGA-BL-A13J-11	-2.47721	BLCA
TCGA-DK-AA6L-01	1.13713	BLCA
TCGA-BT-A3PJ-01	0.783273	BLCA
TCGA-K4-A5RH-01	1.55286	BLCA
TCGA-BT-A0YX-01	-0.181449	BLCA
TCGA-XF-A9SK-01	0.452578	BLCA
TCGA-UY-A9PH-01	0.548877	BLCA
TCGA-ZF-A9RC-01	0.171755	BLCA
TCGA-DK-AA74-01	2.60718	BLCA
TCGA-XF-A9SX-01	0.0972434	BLCA
TCGA-XF-AAN1-01	-1.33982	BLCA
TCGA-FD-A43X-01	-1.1856	BLCA
TCGA-K4-A3WS-01	0.139815	BLCA
TCGA-G2-AA3D-01	1.18663	BLCA
TCGA-GU-AATQ-01	-0.189164	BLCA
TCGA-GD-A3OQ-01	1.45217	BLCA
TCGA-DK-A3WW-01	2.2685	BLCA
TCGA-PQ-A6FI-01	1.37163	BLCA
TCGA-BL-A5ZZ-01	-0.935895	BLCA
TCGA-E7-A5KE-01	-2.5149	BLCA
TCGA-FD-A3SQ-01	1.32436	BLCA
TCGA-DK-A1AG-01	-0.471305	BLCA
TCGA-DK-A3IT-01	0.165302	BLCA
TCGA-BT-A20R-11	-2.75689	BLCA
TCGA-XF-AAMR-01	-0.142645	BLCA
TCGA-HQ-A5NE-01	0.705463	BLCA
TCGA-ZF-AA52-01	1.7591	BLCA
TCGA-E7-A541-01	0.192542	BLCA
TCGA-UY-A8OB-01	0.71488	BLCA
TCGA-XF-AAN5-01	-0.427441	BLCA
TCGA-E7-A97P-01	1.22846	BLCA
TCGA-GC-A3RD-01	-0.175795	BLCA
TCGA-E7-A7XN-01	1.96457	BLCA
TCGA-GV-A3JX-01	0.425525	BLCA
TCGA-4Z-AA83-01	1.06506	BLCA
TCGA-ZF-AA5N-01	-1.18398	BLCA
TCGA-H4-A2HQ-01	-1.36219	BLCA
TCGA-G2-A2EF-01	1.42417	BLCA
TCGA-UY-A9PF-01	0.86594	BLCA
TCGA-XF-A9SU-01	-0.340765	BLCA
TCGA-DK-A3WY-01	-0.144656	BLCA
TCGA-5N-A9KM-01	0.0517287	BLCA
TCGA-DK-AA6T-01	0.770028	BLCA
TCGA-E5-A4TZ-01	-0.0583997	BLCA
TCGA-FD-A43N-01	0.105917	BLCA
TCGA-5N-A9KI-01	-0.950839	BLCA
TCGA-BT-A20Q-11	-2.67236	BLCA
TCGA-FD-A3SP-01	0.689938	BLCA
TCGA-BT-A20U-11	-0.585282	BLCA
TCGA-XF-AAMH-01	0.0664822	BLCA
TCGA-DK-A2I2-01	0.323681	BLCA
TCGA-KQ-A41O-01	-1.58573	BLCA
TCGA-DK-A3IM-01	-0.258401	BLCA
TCGA-4Z-AA7Q-01	1.15058	BLCA
TCGA-K4-A3WV-11	-1.1758	BLCA
TCGA-DK-A2I6-01	-0.455039	BLCA
TCGA-CU-A0YN-11	-2.0282	BLCA
TCGA-DK-A6B6-01	1.33268	BLCA
TCGA-CU-A72E-01	-0.284355	BLCA
TCGA-FT-A61P-01	0.394889	BLCA
TCGA-DK-A3IQ-01	-0.669253	BLCA
TCGA-UY-A78N-01	-0.332953	BLCA
TCGA-GC-A6I3-11	0.764059	BLCA
TCGA-4Z-AA7Y-01	-0.603695	BLCA
TCGA-G2-A2EK-01	-0.04815	BLCA
TCGA-FD-A3SO-01	0.667836	BLCA
TCGA-GC-A3WC-01	-0.295799	BLCA
TCGA-4Z-AA7M-01	-0.442873	BLCA
TCGA-BL-A3JM-01	0.222432	BLCA
TCGA-ZF-AA4U-01	-0.0966652	BLCA
TCGA-ZF-AA53-01	0.900298	BLCA
TCGA-CF-A9FF-01	-0.461688	BLCA
TCGA-DK-A3IV-01	0.447798	BLCA
TCGA-BT-A2LA-11	0.416398	BLCA
TCGA-FJ-A3Z9-01	-0.50869	BLCA
TCGA-XF-AAMT-01	-0.765198	BLCA
TCGA-XF-AAN4-01	-0.475804	BLCA
TCGA-XF-A8HB-01	-1.17949	BLCA
TCGA-BT-A0S7-01	-1.04994	BLCA
TCGA-FD-A5C1-01	0.939992	BLCA
TCGA-FD-A3B4-01	0.0303963	BLCA
TCGA-FD-A3N5-01	0.302529	BLCA
TCGA-4Z-AA86-01	0.786669	BLCA
TCGA-4Z-AA7O-01	-0.523856	BLCA
TCGA-BT-A2LB-01	0.216428	BLCA
TCGA-GV-A3QF-01	-1.28825	BLCA
TCGA-E7-A7DV-01	1.27584	BLCA
TCGA-XF-A9SI-01	0.233446	BLCA
TCGA-C4-A0F7-01	-1.98598	BLCA
TCGA-DK-A6AW-01	-0.253149	BLCA
TCGA-DK-AA75-01	-0.421928	BLCA
TCGA-FD-A62O-01	0.437592	BLCA
TCGA-LT-A5Z6-01	-0.111831	BLCA
TCGA-FD-A3B8-01	0.520738	BLCA
TCGA-FJ-A3ZE-01	-1.23598	BLCA
TCGA-ZF-A9RM-01	-0.36835	BLCA
TCGA-UY-A78L-01	-0.337368	BLCA
TCGA-DK-A2I1-01	-0.835567	BLCA
TCGA-FD-A62S-01	-0.768658	BLCA
TCGA-XF-AAMZ-01	-0.785156	BLCA
TCGA-FD-A3SM-01	0.495339	BLCA
TCGA-E7-A85H-01	0.335685	BLCA
TCGA-E7-A678-01	1.15592	BLCA
TCGA-BT-A20X-01	0.985833	BLCA
TCGA-CF-A9FH-01	0.678843	BLCA
TCGA-FD-A3N6-01	-0.86207	BLCA
TCGA-CF-A47T-01	-0.947439	BLCA
TCGA-4Z-AA7W-01	1.36344	BLCA
TCGA-C4-A0F6-01	-1.75519	BLCA
TCGA-4Z-AA7S-01	0.578144	BLCA
TCGA-UY-A78K-01	0.688479	BLCA
TCGA-4Z-AA87-01	1.64387	BLCA
TCGA-DK-A3IN-01	0.0907382	BLCA
TCGA-CU-A0YO-01	1.04559	BLCA
TCGA-ZF-A9R5-01	0.0704135	BLCA
TCGA-ZF-A9R1-01	0.426852	BLCA
TCGA-CF-A47S-01	0.539061	BLCA
TCGA-FD-A62N-01	1.33264	BLCA
TCGA-YC-A89H-01	-0.550946	BLCA
TCGA-GU-A42R-01	-0.137448	BLCA
TCGA-CF-A47X-01	-0.820677	BLCA
TCGA-2F-A9KQ-01	-0.78024	BLCA
TCGA-DK-A1A7-01	-0.967191	BLCA
TCGA-LT-A8JT-01	-1.18485	BLCA
TCGA-GV-A6ZA-01	0.128174	BLCA
TCGA-FD-A5BT-01	2.83667	BLCA
TCGA-GV-A3QH-01	0.410792	BLCA
TCGA-SY-A9G0-01	-0.00547321	BLCA
TCGA-BT-A2LD-01	-0.495465	BLCA
TCGA-DK-A1AC-01	1.86277	BLCA
TCGA-FD-A6TD-01	2.05658	BLCA
TCGA-DK-AA77-01	0.706193	BLCA
TCGA-XF-A8HC-01	-1.34921	BLCA
TCGA-PQ-A6FN-01	-0.589068	BLCA
TCGA-XF-A9SL-01	0.687686	BLCA
TCGA-GC-A6I1-01	1.03166	BLCA
TCGA-FD-A5BX-01	0.592655	BLCA
TCGA-BT-A20V-01	-0.274791	BLCA
TCGA-FD-A6TA-01	0.627235	BLCA
TCGA-GV-A3JW-01	-1.826	BLCA
TCGA-CF-A1HS-01	-0.351283	BLCA
TCGA-CU-A5W6-01	-0.361887	BLCA
TCGA-FD-A6TC-01	-0.807056	BLCA
TCGA-GC-A3I6-01	1.44178	BLCA
TCGA-FD-A6TH-01	1.03277	BLCA
TCGA-K4-A83P-01	0.563914	BLCA
TCGA-BT-A20N-01	-1.2757	BLCA
TCGA-GD-A3OQ-11	-0.273358	BLCA
TCGA-UY-A9PB-01	2.53984	BLCA
TCGA-E7-A4IJ-01	0.953884	BLCA
TCGA-DK-A3IL-01	-1.42473	BLCA
TCGA-ZF-AA51-01	-0.546333	BLCA
TCGA-E7-A7PW-01	-0.739706	BLCA
TCGA-FD-A62P-01	0.618761	BLCA
TCGA-GV-A40G-01	-0.696501	BLCA
TCGA-GD-A2C5-01	-0.909062	BLCA
TCGA-GU-AATO-01	1.09172	BLCA
TCGA-BT-A3PK-01	1.12423	BLCA
TCGA-K4-A54R-01	1.75268	BLCA
TCGA-DK-A1A6-01	1.4871	BLCA
TCGA-K4-A5RI-01	-0.670047	BLCA
TCGA-E7-A519-01	2.87554	BLCA
TCGA-2F-A9KO-01	0.494465	BLCA
TCGA-XF-A9SZ-01	0.696306	BLCA
TCGA-DK-A2HX-01	-1.45645	BLCA
TCGA-DK-AA6P-01	-1.61355	BLCA
TCGA-XF-A9SM-01	1.53552	BLCA
TCGA-S5-A6DX-01	1.17611	BLCA
TCGA-G2-AA3B-01	-0.849735	BLCA
TCGA-GU-AATP-01	-0.131228	BLCA
TCGA-FD-A43Y-01	1.33665	BLCA
TCGA-GD-A3OP-11	-0.0898722	BLCA
TCGA-ZF-A9RE-01	-1.69873	BLCA
TCGA-2F-A9KW-01	-1.17617	BLCA
TCGA-DK-A1AB-01	-0.763825	BLCA
TCGA-CU-A0YN-01	0.14295	BLCA
TCGA-GC-A3BM-01	-1.07595	BLCA
TCGA-FD-A5BV-01	-2.09419	BLCA
TCGA-FD-A3SS-01	0.0126247	BLCA
TCGA-K4-A6FZ-01	0.0104532	BLCA
TCGA-GD-A76B-01	0.155386	BLCA
TCGA-DK-AA71-01	0.408013	BLCA
TCGA-4Z-AA7R-01	-0.10835	BLCA
TCGA-ZF-AA58-01	1.04324	BLCA
TCGA-K4-A6MB-01	-0.0181971	BLCA
TCGA-DK-A6B5-01	0.730865	BLCA
TCGA-HQ-A5ND-01	-1.0527	BLCA
TCGA-E7-A8O8-01	-0.392076	BLCA
TCGA-UY-A8OD-01	-1.2829	BLCA
TCGA-E7-A8O7-01	0.897641	BLCA
TCGA-XF-AAMX-01	-1.00332	BLCA
TCGA-XF-AAN0-01	-0.29233	BLCA
TCGA-4Z-AA82-01	0.370187	BLCA
TCGA-ZF-A9R7-01	0.0108841	BLCA
TCGA-E7-A4XJ-01	1.07565	BLCA
TCGA-XF-A8HG-01	-1.12052	BLCA
TCGA-XF-A8HD-01	1.03583	BLCA
TCGA-FJ-A3ZF-01	-0.672172	BLCA
TCGA-UY-A9PD-01	-0.813514	BLCA
TCGA-G2-A2EL-01	-2.1799	BLCA
TCGA-XF-A9SP-01	0.342679	BLCA
TCGA-DK-AA6U-01	-0.311778	BLCA
TCGA-ZF-AA5H-01	-0.624921	BLCA
TCGA-ZF-AA54-01	0.197396	BLCA
TCGA-XF-A9ST-01	-1.39979	BLCA
TCGA-KQ-A41R-01	-1.96872	BLCA
TCGA-XF-AAN3-01	0.26295	BLCA
TCGA-KQ-A41Q-01	-0.980483	BLCA
TCGA-BT-A20W-11	-0.0159478	BLCA
TCGA-SY-A9G5-01	1.16115	BLCA
TCGA-4Z-AA89-01	0.516394	BLCA
TCGA-C4-A0F0-01	-0.80797	BLCA
TCGA-K4-AAQO-01	-0.469315	BLCA
TCGA-E7-A7DU-01	-0.473071	BLCA
TCGA-DK-A1A3-01	-0.742394	BLCA
TCGA-KQ-A41N-01	-1.57778	BLCA
TCGA-XF-A9T6-01	-0.865613	BLCA
TCGA-DK-A2I4-01	1.08533	BLCA
TCGA-BT-A42E-01	1.30508	BLCA
TCGA-FD-A43P-01	0.232449	BLCA
TCGA-FD-A3SJ-01	-0.090697	BLCA
TCGA-HQ-A2OE-01	-0.83193	BLCA
TCGA-UY-A78O-01	-1.50422	BLCA
TCGA-BT-A20T-01	1.03014	BLCA
TCGA-YC-A8S6-01	0.370503	BLCA
TCGA-E7-A5KF-01	-0.269168	BLCA
TCGA-BL-A13J-01	-2.15951	BLCA
TCGA-DK-AA6R-01	-0.225921	BLCA
TCGA-G2-A2EJ-01	-0.302337	BLCA
TCGA-FD-A3SN-01	1.33714	BLCA
TCGA-G2-A3VY-01	-0.0622095	BLCA
TCGA-ZF-AA4X-01	-0.207026	BLCA
TCGA-DK-A3IK-01	-0.423486	BLCA
TCGA-XF-AAMY-01	0.14139	BLCA
TCGA-FD-A5C0-01	0.0965167	BLCA
TCGA-XF-A8HI-01	-0.824327	BLCA
TCGA-GD-A2C5-11	-0.764586	BLCA
TCGA-GV-A40E-01	0.461441	BLCA
TCGA-CF-A47W-01	0.986141	BLCA
TCGA-XF-AAN2-01	0.824229	BLCA
TCGA-FD-A3B5-01	-0.220075	BLCA
TCGA-4Z-AA80-01	-1.65878	BLCA
TCGA-CF-A3MF-01	-0.108629	BLCA
TCGA-CF-A3MI-01	0.831661	BLCA
TCGA-G2-A3IE-01	-0.0515664	BLCA
TCGA-4Z-AA84-01	-0.295548	BLCA
TCGA-ZF-A9R2-01	0.380857	BLCA
TCGA-C4-A0F1-01	1.09938	BLCA
TCGA-DK-A6AV-01	-1.08712	BLCA
TCGA-XF-A9SH-01	-0.945824	BLCA
TCGA-DK-AA6W-01	-0.36697	BLCA
TCGA-R3-A69X-01	0.404153	BLCA
TCGA-FD-A3B6-01	1.63687	BLCA
TCGA-ZF-AA5P-01	0.140584	BLCA
TCGA-GU-A42Q-01	-0.795188	BLCA
TCGA-HQ-A2OF-01	-1.51743	BLCA
TCGA-2F-A9KR-01	-1.39571	BLCA
TCGA-CF-A5U8-01	0.821238	BLCA
TCGA-BT-A20R-01	-1.21177	BLCA
TCGA-XF-AAML-01	0.343149	BLCA
TCGA-GV-A3QK-01	-0.407124	BLCA
TCGA-E7-A6MD-01	-0.163675	BLCA
TCGA-BL-A0C8-01	-1.87694	BLCA
TCGA-FD-A6TG-01	-0.315133	BLCA
TCGA-GU-A766-01	2.30403	BLCA
TCGA-BT-A20Q-01	1.17115	BLCA
TCGA-XF-A9T4-01	0.608297	BLCA
TCGA-GD-A6C6-01	0.550578	BLCA
TCGA-BT-A20U-01	-0.612835	BLCA
TCGA-FD-A6TK-01	1.77538	BLCA
TCGA-K4-A3WV-01	-0.791147	BLCA
TCGA-DK-A3X2-01	-0.0121439	BLCA
TCGA-CF-A9FM-01	1.23196	BLCA
TCGA-CU-A3YL-01	0.613962	BLCA
TCGA-ZF-A9R3-01	-1.0114	BLCA
TCGA-DK-AA6M-01	0.923869	BLCA
TCGA-CF-A47Y-01	-0.0338856	BLCA
TCGA-BT-A3PH-01	-0.728922	BLCA
TCGA-CF-A3MH-01	-0.427413	BLCA
TCGA-CF-A27C-01	0.176431	BLCA
TCGA-BT-A2LA-01	-2.56417	BLCA
TCGA-G2-AA3F-01	-0.820391	BLCA
TCGA-FD-A5BZ-01	-1.54955	BLCA
TCGA-DK-A1A5-01	-0.14983	BLCA
TCGA-K4-A5RJ-01	2.26722	BLCA
TCGA-XF-A9SY-01	0.451311	BLCA
TCGA-CF-A8HX-01	-0.97487	BLCA
TCGA-BT-A20J-01	0.0370733	BLCA
TCGA-DK-A1AF-01	-0.285597	BLCA
TCGA-GU-A764-01	1.87933	BLCA
TCGA-GC-A6I3-01	0.0651599	BLCA
TCGA-DK-A6B1-01	-0.323163	BLCA
TCGA-FD-A5BY-01	-0.489083	BLCA
TCGA-FD-A43U-01	1.02953	BLCA
TCGA-BT-A2LB-11	-0.217856	BLCA
TCGA-GV-A3JV-01	-0.418749	BLCA
TCGA-GC-A3WC-11	-1.12709	BLCA
TCGA-E7-A3Y1-01	-0.367732	BLCA
TCGA-GD-A3OS-01	-0.416353	BLCA
TCGA-E7-A97Q-01	-2.10166	BLCA
TCGA-2F-A9KT-01	0.625728	BLCA
TCGA-FD-A6TB-01	0.256408	BLCA
TCGA-CF-A5UA-01	-0.130932	BLCA
TCGA-UY-A8OC-01	-0.618425	BLCA
TCGA-GV-A3QG-01	0.907545	BLCA
TCGA-FD-A6TI-01	0.632917	BLCA
TCGA-C4-A0EZ-01	-1.95342	BLCA
TCGA-ZF-A9RF-01	0.840281	BLCA
TCGA-UY-A78P-01	0.12401	BLCA
TCGA-ZF-AA4R-01	0.354996	BLCA
TCGA-DK-A1AE-01	-0.0553046	BLCA
TCGA-DK-A3IU-01	1.64083	BLCA
TCGA-XF-A9T2-01	0.182627	BLCA
TCGA-GU-A763-01	0.712278	BLCA
TCGA-XF-AAN8-01	-0.32941	BLCA
TCGA-FD-A5BR-01	0.886192	BLCA
TCGA-G2-A2EC-01	-0.93574	BLCA
TCGA-LC-A66R-01	0.809814	BLCA
TCGA-K4-A4AB-01	-0.418213	BLCA
TCGA-XF-AAN7-01	-1.18556	BLCA
TCGA-GV-A3JZ-01	-0.564687	BLCA
TCGA-4Z-AA7N-01	1.66402	BLCA
TCGA-E7-A677-01	0.0125286	BLCA
TCGA-XF-A9SW-01	-0.402314	BLCA
TCGA-DK-A3WX-01	0.473718	BLCA
TCGA-G2-AA3C-01	0.909745	BLCA
TCGA-C8-A1HL-01	-0.827113	BRCA
TCGA-EW-A2FS-01	0.306053	BRCA
TCGA-E2-A153-11	-0.724627	BRCA
TCGA-A2-A3XX-01	1.21051	BRCA
TCGA-BH-A0BQ-11	-1.28595	BRCA
TCGA-Z7-A8R5-01	1.58129	BRCA
TCGA-B6-A0RL-01	-0.840369	BRCA
TCGA-BH-A204-11	-1.84468	BRCA
TCGA-E2-A2P6-01	0.260064	BRCA
TCGA-AO-A1KT-01	-0.123398	BRCA
TCGA-E9-A3HO-01	0.461135	BRCA
TCGA-D8-A1XJ-01	-1.51333	BRCA
TCGA-AC-A2FK-01	-0.815621	BRCA
TCGA-E9-A1RF-11	-2.12314	BRCA
TCGA-E9-A1R4-01	1.35763	BRCA
TCGA-LL-A740-01	-0.170304	BRCA
TCGA-BH-A0BZ-01	1.20134	BRCA
TCGA-C8-A3M8-01	-0.862259	BRCA
TCGA-BH-A0BM-01	-0.584483	BRCA
TCGA-AN-A0XW-01	1.44374	BRCA
TCGA-E2-A1LL-01	-0.12442	BRCA
TCGA-BH-A18K-01	0.215078	BRCA
TCGA-BH-A28O-01	-0.664802	BRCA
TCGA-A7-A4SC-01	-0.0430573	BRCA
TCGA-A7-A13F-11	-1.18976	BRCA
TCGA-E9-A24A-01	-0.0786291	BRCA
TCGA-AC-A6IV-01	-1.54203	BRCA
TCGA-B6-A400-01	0.955962	BRCA
TCGA-A8-A096-01	1.32115	BRCA
TCGA-E2-A1LH-01	1.48874	BRCA
TCGA-B6-A0RH-01	0.720389	BRCA
TCGA-A8-A07W-01	0.226642	BRCA
TCGA-AC-A23H-11	-1.19455	BRCA
TCGA-BH-A0HA-11	-1.57911	BRCA
TCGA-A7-A0CE-11	0.528615	BRCA
TCGA-BH-A0HK-11	-0.139094	BRCA
TCGA-B6-A0X7-01	-1.09995	BRCA
TCGA-EW-A1P0-01	-0.527283	BRCA
TCGA-EW-A1PC-01	0.895048	BRCA
TCGA-A7-A0CH-01	-0.38418	BRCA
TCGA-E9-A2JS-01	0.0780521	BRCA
TCGA-A2-A1G6-01	-0.716537	BRCA
TCGA-B6-A0WV-01	-1.46616	BRCA
TCGA-UL-AAZ6-01	0.459871	BRCA
TCGA-B6-A0RG-01	-0.682316	BRCA
TCGA-BH-A0B7-11	-1.2274	BRCA
TCGA-A7-A0DC-01	-2.91404	BRCA
TCGA-A2-A0CR-01	2.05029	BRCA
TCGA-GM-A2DD-01	0.850605	BRCA
TCGA-BH-A6R9-01	0.794738	BRCA
TCGA-E2-A158-11	-1.63831	BRCA
TCGA-HN-A2OB-01	-0.638284	BRCA
TCGA-UU-A93S-01	1.65524	BRCA
TCGA-AR-A24P-01	-0.458177	BRCA
TCGA-E9-A1N9-01	-0.703274	BRCA
TCGA-B6-A0I9-01	0.177157	BRCA
TCGA-E2-A1L9-01	0.328712	BRCA
TCGA-AC-A23H-01	0.263264	BRCA
TCGA-AR-A1AP-01	0.758422	BRCA
TCGA-BH-A0H5-01	1.90875	BRCA
TCGA-OK-A5Q2-01	0.444688	BRCA
TCGA-BH-A0E6-01	1.4294	BRCA
TCGA-D8-A1JA-01	-1.40015	BRCA
TCGA-BH-A0BW-01	0.8603	BRCA
TCGA-B6-A0WZ-01	0.125013	BRCA
TCGA-C8-A135-01	0.930983	BRCA
TCGA-BH-A0E2-01	-0.631573	BRCA
TCGA-BH-A0BJ-01	-0.366758	BRCA
TCGA-BH-A203-01	0.101696	BRCA
TCGA-A2-A1G1-01	1.12295	BRCA
TCGA-BH-A0C7-01	-0.642555	BRCA
TCGA-E2-A14X-01	0.222307	BRCA
TCGA-BH-A8FZ-01	0.627448	BRCA
TCGA-S3-AA17-01	1.71032	BRCA
TCGA-AR-A1AR-01	0.0576179	BRCA
TCGA-D8-A13Z-01	0.520968	BRCA
TCGA-BH-A0DV-11	-1.78816	BRCA
TCGA-A7-A6VX-01	-0.26078	BRCA
TCGA-AR-A255-01	0.474792	BRCA
TCGA-AR-A1AT-01	0.90776	BRCA
TCGA-A2-A0CU-01	-0.996406	BRCA
TCGA-BH-A0AZ-01	0.29066	BRCA
TCGA-BH-A1ET-11	-1.41301	BRCA
TCGA-E2-A1IH-01	0.114661	BRCA
TCGA-BH-A18R-01	-0.461036	BRCA
TCGA-AC-A4ZE-01	-0.44002	BRCA
TCGA-B6-A0RS-01	0.591869	BRCA
TCGA-AR-A24H-01	0.0610347	BRCA
TCGA-A8-A099-01	0.873905	BRCA
TCGA-A8-A09R-01	0.0146386	BRCA
TCGA-EW-A6SC-01	0.37036	BRCA
TCGA-D8-A1XC-01	-1.26587	BRCA
TCGA-EW-A1PE-01	1.09784	BRCA
TCGA-E2-A1II-01	0.972141	BRCA
TCGA-S3-AA14-01	-1.4022	BRCA
TCGA-A8-A09B-01	-0.0155069	BRCA
TCGA-AR-A5QP-01	0.198398	BRCA
TCGA-E2-A15K-06	0.143827	BRCA
TCGA-E9-A6HE-01	0.740023	BRCA
TCGA-BH-A0HI-01	0.819958	BRCA
TCGA-E9-A1ND-11	0.946649	BRCA
TCGA-EW-A1P1-01	0.0564955	BRCA
TCGA-OL-A66P-01	2.5473	BRCA
TCGA-A2-A1G4-01	-0.174736	BRCA
TCGA-E2-A105-01	-0.870284	BRCA
TCGA-E2-A573-01	1.99731	BRCA
TCGA-A2-A0EV-01	0.64988	BRCA
TCGA-BH-A18M-11	-1.44246	BRCA
TCGA-A8-A08A-01	0.485085	BRCA
TCGA-E9-A1RG-01	1.06903	BRCA
TCGA-D8-A1XL-01	2.31796	BRCA
TCGA-BH-A1EO-11	-0.068982	BRCA
TCGA-A2-A0ER-01	-0.532861	BRCA
TCGA-OL-A66K-01	0.0770429	BRCA
TCGA-EW-A1OX-01	-3.006	BRCA
TCGA-S3-AA10-01	2.14957	BRCA
TCGA-A8-A0A9-01	0.203672	BRCA
TCGA-BH-A1FB-01	0.0879269	BRCA
TCGA-A2-A04T-01	0.537494	BRCA
TCGA-OL-A5S0-01	1.58957	BRCA
TCGA-A8-A07J-01	-0.258347	BRCA
TCGA-E9-A229-01	0.365291	BRCA
TCGA-A2-A0SX-01	0.596921	BRCA
TCGA-BH-A0AW-01	1.46509	BRCA
TCGA-BH-A2L8-01	1.47264	BRCA
TCGA-BH-A0B6-01	2.55588	BRCA
TCGA-AC-A2FB-11	-0.804168	BRCA
TCGA-AO-A0JL-01	-0.144984	BRCA
TCGA-BH-A0BS-01	0.0955045	BRCA
TCGA-B6-A0IG-01	-0.725904	BRCA
TCGA-OL-A66L-01	1.47737	BRCA
TCGA-BH-A0DO-01	-1.04562	BRCA
TCGA-LL-A73Y-01	-0.436536	BRCA
TCGA-BH-A0DK-01	1.21183	BRCA
TCGA-BH-A0BG-01	0.876314	BRCA
TCGA-A8-A06Z-01	-0.17965	BRCA
TCGA-E9-A1RH-11	-2.09041	BRCA
TCGA-AN-A0AT-01	0.507289	BRCA
TCGA-E2-A14U-01	-0.398684	BRCA
TCGA-AR-A24Q-01	-0.407196	BRCA
TCGA-BH-A0DP-11	-1.08113	BRCA
TCGA-EW-A1P5-01	0.484132	BRCA
TCGA-BH-A1FN-01	-0.375656	BRCA
TCGA-A7-A4SE-01	-0.119367	BRCA
TCGA-A1-A0SJ-01	-0.649355	BRCA
TCGA-E2-A570-01	0.129179	BRCA
TCGA-BH-A201-01	-0.919184	BRCA
TCGA-BH-A0H9-11	-2.07353	BRCA
TCGA-A8-A09E-01	0.0877865	BRCA
TCGA-D8-A27V-01	-0.720764	BRCA
TCGA-E2-A14Y-01	0.141963	BRCA
TCGA-MS-A51U-01	-0.118846	BRCA
TCGA-A8-A06Y-01	-0.343544	BRCA
TCGA-GI-A2C8-01	-0.513471	BRCA
TCGA-AR-A1AM-01	-0.22105	BRCA
TCGA-AN-A041-01	-1.46648	BRCA
TCGA-B6-A409-01	0.571872	BRCA
TCGA-BH-A1EX-01	-0.126932	BRCA
TCGA-BH-A0C3-11	-0.707525	BRCA
TCGA-A7-A0CJ-01	1.16134	BRCA
TCGA-BH-A0H0-01	-0.0218581	BRCA
TCGA-LL-A5YO-01	2.29413	BRCA
TCGA-AN-A0FW-01	-0.184771	BRCA
TCGA-AC-A6IX-06	0.722055	BRCA
TCGA-AC-A6IX-01	0.416845	BRCA
TCGA-A2-A04Y-01	0.476082	BRCA
TCGA-BH-A1FU-11	-1.31183	BRCA
TCGA-E2-A156-01	-0.720729	BRCA
TCGA-AR-A24R-01	-0.28792	BRCA
TCGA-D8-A1JP-01	0.169907	BRCA
TCGA-E2-A1IK-01	0.973214	BRCA
TCGA-AN-A0FS-01	-0.859106	BRCA
TCGA-AC-A3TM-01	1.73345	BRCA
TCGA-C8-A12K-01	1.59018	BRCA
TCGA-AR-A2LE-01	-0.729316	BRCA
TCGA-BH-A0HK-01	-0.272742	BRCA
TCGA-AR-A250-01	0.297139	BRCA
TCGA-D8-A1JG-01	0.658403	BRCA
TCGA-C8-A134-01	0.603579	BRCA
TCGA-AN-A0FX-01	-0.251103	BRCA
TCGA-AC-A62V-01	1.96874	BRCA
TCGA-GM-A3XN-01	0.285011	BRCA
TCGA-C8-A275-01	0.77706	BRCA
TCGA-AO-A129-01	1.29112	BRCA
TCGA-BH-A1F8-01	0.273149	BRCA
TCGA-D8-A1JK-01	1.05918	BRCA
TCGA-A8-A08X-01	1.03844	BRCA
TCGA-AR-A2LN-01	-0.247121	BRCA
TCGA-A8-A09A-01	-0.854266	BRCA
TCGA-E2-A1IJ-01	0.400218	BRCA
TCGA-A8-A08O-01	-0.864414	BRCA
TCGA-A2-A4RY-01	-0.154009	BRCA
TCGA-A2-A0SY-01	0.420484	BRCA
TCGA-AC-A8OP-01	-0.0017482	BRCA
TCGA-EW-A1PA-01	-0.492781	BRCA
TCGA-AO-A126-01	0.287027	BRCA
TCGA-AO-A0J6-01	2.13839	BRCA
TCGA-EW-A6SB-01	1.99077	BRCA
TCGA-EW-A2FV-01	-0.10367	BRCA
TCGA-AO-A03R-01	0.891657	BRCA
TCGA-E9-A54X-01	-2.13368	BRCA
TCGA-AO-A0JB-01	-0.0514248	BRCA
TCGA-AC-A3W5-01	1.04046	BRCA
TCGA-A7-A13G-01	-1.15673	BRCA
TCGA-AR-A1AS-01	-0.544294	BRCA
TCGA-C8-A1HJ-01	-1.06409	BRCA
TCGA-D8-A1Y1-01	0.0862305	BRCA
TCGA-BH-A0DD-01	3.12109	BRCA
TCGA-A2-A0EN-01	0.795243	BRCA
TCGA-E9-A1R2-01	-0.515968	BRCA
TCGA-E9-A1N4-11	-1.2454	BRCA
TCGA-A8-A08L-01	-0.140811	BRCA
TCGA-A7-A3RF-01	-0.0984053	BRCA
TCGA-A2-A0D4-01	-0.780062	BRCA
TCGA-EW-A1IW-01	0.128275	BRCA
TCGA-AO-A03M-01	0.916495	BRCA
TCGA-B6-A0IQ-01	-0.847294	BRCA
TCGA-BH-A1EW-01	0.258976	BRCA
TCGA-BH-A1FG-01	-0.104152	BRCA
TCGA-AR-A0TS-01	0.63903	BRCA
TCGA-A2-A0CM-01	1.33671	BRCA
TCGA-A8-A06X-01	1.41342	BRCA
TCGA-BH-A18S-11	-0.37766	BRCA
TCGA-D8-A140-01	0.212326	BRCA
TCGA-E9-A1R6-01	-0.115699	BRCA
TCGA-A2-A0CZ-01	-0.146782	BRCA
TCGA-BH-A1FE-01	0.286727	BRCA
TCGA-AN-A0XS-01	0.557373	BRCA
TCGA-A2-A04Q-01	2.19037	BRCA
TCGA-WT-AB41-01	2.69901	BRCA
TCGA-BH-A0BV-01	0.0541058	BRCA
TCGA-AC-A5XS-01	1.12784	BRCA
TCGA-E2-A109-01	-0.561426	BRCA
TCGA-GI-A2C9-11	-0.279959	BRCA
TCGA-B6-A1KF-01	0.377394	BRCA
TCGA-BH-A1FL-01	-0.820429	BRCA
TCGA-E9-A1NI-01	-0.800609	BRCA
TCGA-A8-A07R-01	0.457882	BRCA
TCGA-AN-A03Y-01	0.894137	BRCA
TCGA-E2-A1L7-11	-0.111052	BRCA
TCGA-BH-A0C1-01	-0.183169	BRCA
TCGA-BH-A1FH-01	-1.47232	BRCA
TCGA-E2-A572-01	0.667853	BRCA
TCGA-A8-A08H-01	1.25322	BRCA
TCGA-JL-A3YW-01	0.753148	BRCA
TCGA-AN-A0XN-01	-0.0588439	BRCA
TCGA-A1-A0SK-01	-2.11924	BRCA
TCGA-AO-A125-01	0.00187361	BRCA
TCGA-PE-A5DC-01	-0.391505	BRCA
TCGA-E9-A3X8-01	2.11028	BRCA
TCGA-BH-A0AU-01	-0.132682	BRCA
TCGA-E9-A1NA-11	-0.736658	BRCA
TCGA-GM-A2DB-01	-0.72494	BRCA
TCGA-E9-A244-01	-0.796872	BRCA
TCGA-A8-A0AB-01	-1.60131	BRCA
TCGA-A2-A3XV-01	0.165153	BRCA
TCGA-AN-A04A-01	-1.00435	BRCA
TCGA-E2-A14O-01	1.07304	BRCA
TCGA-A2-A0T7-01	-0.431629	BRCA
TCGA-A7-A0D9-01	-2.11197	BRCA
TCGA-GM-A3XL-01	1.08182	BRCA
TCGA-AO-A0JJ-01	0.428204	BRCA
TCGA-A2-A0CV-01	0.281275	BRCA
TCGA-BH-A0E0-11	-0.309719	BRCA
TCGA-AN-A046-01	1.00679	BRCA
TCGA-D8-A1X6-01	0.195497	BRCA
TCGA-EW-A3U0-01	1.53967	BRCA
TCGA-AO-A0JF-01	0.0873535	BRCA
TCGA-A2-A0T0-01	1.02278	BRCA
TCGA-BH-A0EA-01	-0.227158	BRCA
TCGA-D8-A147-01	0.61494	BRCA
TCGA-E9-A54Y-01	1.24963	BRCA
TCGA-LL-A5YN-01	2.70326	BRCA
TCGA-C8-A26Y-01	-0.186137	BRCA
TCGA-AN-A0FJ-01	-0.729839	BRCA
TCGA-BH-A1EV-01	-0.400816	BRCA
TCGA-AO-A03V-01	-1.39832	BRCA
TCGA-B6-A0IK-01	-0.74106	BRCA
TCGA-E9-A1R7-11	-1.74283	BRCA
TCGA-E2-A15E-01	-1.075	BRCA
TCGA-E2-A15D-01	-0.572193	BRCA
TCGA-E9-A1RB-01	0.0860371	BRCA
TCGA-AO-A1KR-01	0.933773	BRCA
TCGA-BH-A18H-01	0.933611	BRCA
TCGA-BH-A0HF-01	0.75814	BRCA
TCGA-C8-A12M-01	-0.844641	BRCA
TCGA-C8-A26V-01	0.453313	BRCA
TCGA-B6-A1KN-01	-0.265114	BRCA
TCGA-A7-A4SA-01	0.446463	BRCA
TCGA-E2-A15S-01	-0.88652	BRCA
TCGA-E9-A1RI-01	-0.915057	BRCA
TCGA-GM-A2DI-01	0.682394	BRCA
TCGA-A8-A09T-01	-0.206546	BRCA
TCGA-D8-A27T-01	0.0230828	BRCA
TCGA-C8-A278-01	1.05579	BRCA
TCGA-A8-A09C-01	-0.4251	BRCA
TCGA-BH-A18L-01	-0.878349	BRCA
TCGA-GM-A2DK-01	-0.492952	BRCA
TCGA-E9-A22A-01	0.470243	BRCA
TCGA-AC-A3YJ-01	0.822905	BRCA
TCGA-AR-A2LO-01	0.227177	BRCA
TCGA-BH-A1FD-11	-0.860032	BRCA
TCGA-AC-A23C-01	0.578092	BRCA
TCGA-D8-A1XM-01	-0.0950655	BRCA
TCGA-BH-A1EU-01	-0.360037	BRCA
TCGA-PE-A5DD-01	0.497496	BRCA
TCGA-WT-AB44-01	-1.13848	BRCA
TCGA-C8-A8HR-01	0.357952	BRCA
TCGA-A2-A0YG-01	0.0814692	BRCA
TCGA-A8-A09G-01	1.21054	BRCA
TCGA-EW-A6SA-01	0.102581	BRCA
TCGA-AC-A8OQ-01	1.12673	BRCA
TCGA-A1-A0SO-01	-0.666618	BRCA
TCGA-E2-A10B-01	-0.371074	BRCA
TCGA-D8-A1XA-01	0.456291	BRCA
TCGA-AO-A1KQ-01	2.30962	BRCA
TCGA-A8-A0A6-01	0.783729	BRCA
TCGA-AQ-A04J-01	0.0388468	BRCA
TCGA-BH-A0W4-01	-0.949619	BRCA
TCGA-BH-A0DD-11	0.686577	BRCA
TCGA-D8-A1X5-01	0.93905	BRCA
TCGA-GM-A3XG-01	-0.20871	BRCA
TCGA-A2-A4RW-01	0.0278172	BRCA
TCGA-D8-A1XV-01	-0.990535	BRCA
TCGA-D8-A13Y-01	-2.10864	BRCA
TCGA-AR-A0TU-01	0.763955	BRCA
TCGA-BH-A0B0-01	0.851982	BRCA
TCGA-E2-A15P-01	-0.520358	BRCA
TCGA-D8-A1JN-01	-0.693189	BRCA
TCGA-BH-A0B8-01	0.136104	BRCA
TCGA-E9-A1RD-01	-0.382299	BRCA
TCGA-AC-A2FG-01	-1.02738	BRCA
TCGA-A2-A0ET-01	-0.0284644	BRCA
TCGA-E2-A15R-01	-1.89939	BRCA
TCGA-A2-A3KD-01	-0.634827	BRCA
TCGA-E9-A1NG-01	0.732209	BRCA
TCGA-AC-A6NO-01	-0.164847	BRCA
TCGA-A8-A08J-01	0.840653	BRCA
TCGA-A2-A0CO-01	0.693921	BRCA
TCGA-AN-A0FZ-01	-0.763238	BRCA
TCGA-A2-A0YD-01	-0.128005	BRCA
TCGA-EW-A1J2-01	-0.523322	BRCA
TCGA-C8-A12N-01	0.0727751	BRCA
TCGA-A2-A25F-01	1.1867	BRCA
TCGA-A8-A0A1-01	0.357871	BRCA
TCGA-D8-A27E-01	-0.461261	BRCA
TCGA-EW-A1IZ-01	1.7759	BRCA
TCGA-B6-A0IB-01	0.159795	BRCA
TCGA-A8-A08Z-01	0.0840114	BRCA
TCGA-BH-A208-11	-1.44509	BRCA
TCGA-AC-A3QQ-01	-0.873743	BRCA
TCGA-E2-A15T-01	-1.07038	BRCA
TCGA-BH-A0BC-01	1.35855	BRCA
TCGA-AR-A0TV-01	0.541061	BRCA
TCGA-E2-A154-01	-0.722342	BRCA
TCGA-BH-A0BA-11	-1.13939	BRCA
TCGA-GM-A4E0-01	0.32139	BRCA
TCGA-AO-A124-01	0.745515	BRCA
TCGA-S3-A6ZF-01	0.486039	BRCA
TCGA-A8-A09D-01	-0.752483	BRCA
TCGA-AN-A0XO-01	-0.830661	BRCA
TCGA-BH-A0DQ-01	-0.658278	BRCA
TCGA-A2-A4S3-01	0.692403	BRCA
TCGA-A2-A0D1-01	-1.32026	BRCA
TCGA-AO-A0J3-01	-0.397004	BRCA
TCGA-A2-A0ST-01	1.63684	BRCA
TCGA-E9-A1RE-01	-0.932674	BRCA
TCGA-A2-A25A-01	-0.515117	BRCA
TCGA-C8-A1HK-01	-0.200984	BRCA
TCGA-AR-A0TR-01	-0.80131	BRCA
TCGA-AC-A2B8-01	-0.380043	BRCA
TCGA-E9-A1N6-11	-0.716299	BRCA
TCGA-E2-A1LG-01	-1.21671	BRCA
TCGA-A7-A6VW-01	1.73331	BRCA
TCGA-AC-A3W7-01	-0.0977501	BRCA
TCGA-E2-A1LK-01	0.228921	BRCA
TCGA-B6-A0RT-01	2.03919	BRCA
TCGA-BH-A0HB-01	0.372038	BRCA
TCGA-C8-A3M7-01	-1.32183	BRCA
TCGA-D8-A1Y3-01	1.64335	BRCA
TCGA-A8-A07C-01	0.14324	BRCA
TCGA-A8-A06U-01	0.413711	BRCA
TCGA-GI-A2C9-01	-0.0197212	BRCA
TCGA-BH-A1F6-11	-1.24121	BRCA
TCGA-D8-A73W-01	-0.0518336	BRCA
TCGA-E9-A245-01	-1.51301	BRCA
TCGA-A7-A0DB-11	-0.636428	BRCA
TCGA-B6-A0X0-01	0.57875	BRCA
TCGA-A8-A06Q-01	-0.824527	BRCA
TCGA-E9-A1R0-01	-0.50901	BRCA
TCGA-BH-A1F2-11	-1.36975	BRCA
TCGA-B6-A0RO-01	0.207762	BRCA
TCGA-E9-A1NA-01	0.849317	BRCA
TCGA-BH-A0DZ-01	-0.0100892	BRCA
TCGA-AN-A0XP-01	0.290195	BRCA
TCGA-EW-A6S9-01	-0.54697	BRCA
TCGA-AQ-A54O-01	3.72174	BRCA
TCGA-BH-A0WA-01	-0.77952	BRCA
TCGA-BH-AB28-01	-0.28693	BRCA
TCGA-A8-A09N-01	0.0503241	BRCA
TCGA-E2-A15A-06	0.627477	BRCA
TCGA-E2-A15A-01	-0.111942	BRCA
TCGA-E9-A2JT-01	1.05654	BRCA
TCGA-BH-A0HQ-01	-0.786082	BRCA
TCGA-E2-A3DX-01	0.473249	BRCA
TCGA-E2-A1L6-01	-0.451243	BRCA
TCGA-B6-A0I2-01	1.07633	BRCA
TCGA-D8-A73X-01	0.117135	BRCA
TCGA-A8-A084-01	-0.173678	BRCA
TCGA-A7-A2KD-01	0.190815	BRCA
TCGA-AR-A252-01	0.513603	BRCA
TCGA-AR-A24L-01	-1.24597	BRCA
TCGA-AN-A0XR-01	-0.35423	BRCA
TCGA-BH-A18V-01	0.262484	BRCA
TCGA-BH-A18V-06	1.29772	BRCA
TCGA-B6-A0WY-01	-0.27402	BRCA
TCGA-EW-A423-01	0.792076	BRCA
TCGA-C8-A12X-01	0.989511	BRCA
TCGA-E9-A5UO-01	-0.680448	BRCA
TCGA-BH-A18U-01	-0.913594	BRCA
TCGA-BH-A0C0-01	2.06549	BRCA
TCGA-A8-A09I-01	0.601896	BRCA
TCGA-E9-A22D-01	2.44045	BRCA
TCGA-E2-A1LE-01	1.07134	BRCA
TCGA-E2-A15F-01	-0.587574	BRCA
TCGA-D8-A27L-01	-0.101669	BRCA
TCGA-C8-A12O-01	-0.612972	BRCA
TCGA-D8-A1XG-01	-1.98904	BRCA
TCGA-C8-A8HQ-01	0.598695	BRCA
TCGA-E2-A15M-01	0.756581	BRCA
TCGA-A8-A083-01	1.24195	BRCA
TCGA-E2-A15I-11	-1.92534	BRCA
TCGA-AC-A3TN-01	1.14192	BRCA
TCGA-B6-A0IC-01	0.140767	BRCA
TCGA-A2-A0CW-01	-0.239299	BRCA
TCGA-A8-A092-01	-0.220839	BRCA
TCGA-D8-A1XS-01	2.14713	BRCA
TCGA-BH-A18Q-01	-0.324723	BRCA
TCGA-A7-A13E-11	-1.35162	BRCA
TCGA-AO-A12B-01	0.367657	BRCA
TCGA-AC-A3EH-01	-0.684523	BRCA
TCGA-E2-A1LS-11	-2.34805	BRCA
TCGA-A7-A26F-01	-0.647843	BRCA
TCGA-BH-A0B2-01	0.992868	BRCA
TCGA-AO-A12F-01	-0.198879	BRCA
TCGA-EW-A1P6-01	-1.04864	BRCA
TCGA-GM-A2DF-01	0.671566	BRCA
TCGA-A8-A09Q-01	0.529549	BRCA
TCGA-AC-A2FF-01	-0.179776	BRCA
TCGA-BH-A0BW-11	0.717448	BRCA
TCGA-BH-A18J-01	0.656238	BRCA
TCGA-C8-A12W-01	0.643902	BRCA
TCGA-A2-A0YJ-01	0.585014	BRCA
TCGA-D8-A1XD-01	-2.58394	BRCA
TCGA-AQ-A1H2-01	-0.170846	BRCA
TCGA-AR-A24O-01	-0.68166	BRCA
TCGA-BH-A1FE-06	-0.881929	BRCA
TCGA-A8-A0AD-01	-0.342395	BRCA
TCGA-A7-A3J1-01	0.698914	BRCA
TCGA-A2-A0EQ-01	0.500846	BRCA
TCGA-B6-A402-01	-0.603948	BRCA
TCGA-LD-A7W6-01	-0.0103646	BRCA
TCGA-BH-A1FR-01	0.0073217	BRCA
TCGA-A8-A08B-01	0.311051	BRCA
TCGA-D8-A1XK-01	-0.0618263	BRCA
TCGA-3C-AAAU-01	-0.321022	BRCA
TCGA-BH-A0BT-01	0.184186	BRCA
TCGA-AO-A03U-01	0.754459	BRCA
TCGA-OL-A66H-01	1.26655	BRCA
TCGA-AR-A1AJ-01	2.026	BRCA
TCGA-E9-A5UP-01	1.58539	BRCA
TCGA-AC-A8OS-01	-0.335648	BRCA
TCGA-BH-A0DT-01	0.188279	BRCA
TCGA-LL-A7SZ-01	2.4308	BRCA
TCGA-AN-A0G0-01	-0.286048	BRCA
TCGA-E2-A14Q-01	-0.524353	BRCA
TCGA-A2-A1FZ-01	-0.19903	BRCA
TCGA-OL-A5D6-01	0.00965408	BRCA
TCGA-BH-A0B9-01	1.11513	BRCA
TCGA-AR-A1AQ-01	1.85436	BRCA
TCGA-BH-A1EW-11	-1.60113	BRCA
TCGA-BH-A0DH-11	0.0298394	BRCA
TCGA-E9-A226-01	-1.81662	BRCA
TCGA-E9-A1NF-01	0.10858	BRCA
TCGA-BH-A0DL-01	0.887487	BRCA
TCGA-A2-A4S1-01	1.24579	BRCA
TCGA-E2-A1B0-01	-0.784617	BRCA
TCGA-C8-A26W-01	0.124332	BRCA
TCGA-E9-A1RD-11	-1.66974	BRCA
TCGA-D8-A1JH-01	0.16958	BRCA
TCGA-AO-A12D-01	0.859533	BRCA
TCGA-AC-A2FM-01	-1.59589	BRCA
TCGA-E9-A3Q9-01	-0.39304	BRCA
TCGA-BH-A0B5-11	-1.83853	BRCA
TCGA-AN-A0AL-01	-0.299614	BRCA
TCGA-B6-A0WW-01	-0.516592	BRCA
TCGA-BH-A18N-11	-1.2835	BRCA
TCGA-OL-A5RZ-01	-0.5252	BRCA
TCGA-D8-A1JL-01	0.656444	BRCA
TCGA-A7-A0DB-01	-2.25747	BRCA
TCGA-AR-A1AV-01	1.72242	BRCA
TCGA-D8-A1JC-01	0.0145026	BRCA
TCGA-BH-A209-11	-0.550618	BRCA
TCGA-EW-A1OW-01	-0.340601	BRCA
TCGA-B6-A2IU-01	-0.438545	BRCA
TCGA-C8-A137-01	-1.32843	BRCA
TCGA-E2-A1LB-11	-0.898382	BRCA
TCGA-C8-A1HN-01	0.468965	BRCA
TCGA-E2-A1L8-01	-0.473906	BRCA
TCGA-A7-A26J-01	-1.8067	BRCA
TCGA-BH-A0E7-01	-1.19818	BRCA
TCGA-D8-A73U-01	1.91585	BRCA
TCGA-D8-A27N-01	0.315061	BRCA
TCGA-LL-A8F5-01	0.864889	BRCA
TCGA-C8-A8HP-01	1.17315	BRCA
TCGA-BH-A6R8-01	1.32136	BRCA
TCGA-AC-A2FM-11	0.728181	BRCA
TCGA-BH-A202-01	0.849883	BRCA
TCGA-OL-A5RY-01	1.99156	BRCA
TCGA-OL-A66I-01	1.46425	BRCA
TCGA-E9-A1NF-11	-1.21153	BRCA
TCGA-C8-A12V-01	2.33226	BRCA
TCGA-A7-A26E-01	-1.64783	BRCA
TCGA-AO-A03N-01	-1.57254	BRCA
TCGA-BH-A42T-01	1.42821	BRCA
TCGA-BH-A0HO-01	0.236443	BRCA
TCGA-A8-A09X-01	1.47138	BRCA
TCGA-AR-A254-01	0.124771	BRCA
TCGA-BH-A0HL-01	-1.98275	BRCA
TCGA-BH-A0AZ-11	-1.4984	BRCA
TCGA-AC-A3HN-01	0.318666	BRCA
TCGA-BH-A0H7-01	0.317278	BRCA
TCGA-AC-A6IW-01	2.19499	BRCA
TCGA-EW-A1J5-01	0.815158	BRCA
TCGA-OL-A6VO-01	0.853682	BRCA
TCGA-AC-A23E-01	0.225143	BRCA
TCGA-EW-A1J1-01	-0.233973	BRCA
TCGA-A8-A09W-01	0.21891	BRCA
TCGA-B6-A0IM-01	-0.519859	BRCA
TCGA-BH-A1F0-01	1.36362	BRCA
TCGA-EW-A1PD-01	0.85508	BRCA
TCGA-D8-A1J8-01	0.387309	BRCA
TCGA-B6-A0RV-01	0.148864	BRCA
TCGA-AR-A24N-01	-0.410448	BRCA
TCGA-AQ-A1H3-01	-0.548364	BRCA
TCGA-C8-A131-01	0.228407	BRCA
TCGA-AR-A2LQ-01	-0.601389	BRCA
TCGA-A2-A0EP-01	1.81946	BRCA
TCGA-BH-A0H3-01	-0.361823	BRCA
TCGA-BH-A1FJ-01	-1.27398	BRCA
TCGA-B6-A40C-01	0.378096	BRCA
TCGA-E2-A1IF-01	-0.1112	BRCA
TCGA-AO-A0JE-01	1.17417	BRCA
TCGA-S3-AA11-01	-0.313369	BRCA
TCGA-D8-A27I-01	0.325497	BRCA
TCGA-AC-A3W6-01	0.980941	BRCA
TCGA-AR-A0TX-01	1.13926	BRCA
TCGA-AO-A0JG-01	-0.397687	BRCA
TCGA-A8-A07L-01	-1.26177	BRCA
TCGA-A2-A0SV-01	0.895972	BRCA
TCGA-XX-A899-01	0.742484	BRCA
TCGA-A7-A5ZW-01	0.277988	BRCA
TCGA-E9-A1NE-01	0.641355	BRCA
TCGA-BH-A0BR-01	0.300812	BRCA
TCGA-Z7-A8R6-01	0.142571	BRCA
TCGA-OL-A5D8-01	0.0375216	BRCA
TCGA-B6-A0IJ-01	1.19913	BRCA
TCGA-OL-A5D7-01	2.07006	BRCA
TCGA-A2-A1FW-01	-1.37657	BRCA
TCGA-A7-A13H-01	0.523573	BRCA
TCGA-A2-A0EO-01	-0.750047	BRCA
TCGA-BH-A0BF-01	1.37377	BRCA
TCGA-AR-A5QN-01	-0.477627	BRCA
TCGA-AQ-A54N-01	0.791905	BRCA
TCGA-A2-A04V-01	-0.809621	BRCA
TCGA-E2-A14T-01	-0.41779	BRCA
TCGA-E9-A295-01	-0.185987	BRCA
TCGA-E2-A1BC-11	-1.94654	BRCA
TCGA-EW-A1P4-01	1.74767	BRCA
TCGA-A2-A0T4-01	0.532317	BRCA
TCGA-BH-A0W3-01	0.127497	BRCA
TCGA-BH-A42U-01	0.985585	BRCA
TCGA-A8-A08G-01	0.715792	BRCA
TCGA-BH-A0BQ-01	0.640562	BRCA
TCGA-EW-A1IX-01	-0.220566	BRCA
TCGA-GM-A5PV-01	0.217876	BRCA
TCGA-B6-A401-01	1.24262	BRCA
TCGA-C8-A1HG-01	0.838086	BRCA
TCGA-E2-A10E-01	-0.368173	BRCA
TCGA-A7-A0CG-01	0.174912	BRCA
TCGA-A2-A0CS-01	0.0372844	BRCA
TCGA-A1-A0SG-01	-0.117143	BRCA
TCGA-E2-A1BD-01	-0.24794	BRCA
TCGA-E2-A14Z-01	1.26935	BRCA
TCGA-A2-A04R-01	-3.7625	BRCA
TCGA-A7-A425-01	0.91287	BRCA
TCGA-E9-A1RF-01	0.657792	BRCA
TCGA-B6-A408-01	0.903649	BRCA
TCGA-BH-A0BZ-11	-0.729076	BRCA
TCGA-AN-A0AM-01	1.70892	BRCA
TCGA-D8-A1JU-01	0.085095	BRCA
TCGA-AR-A1AH-01	-1.34071	BRCA
TCGA-BH-A1EN-01	-0.437528	BRCA
TCGA-E9-A3QA-01	1.66183	BRCA
TCGA-BH-A0EB-01	0.553955	BRCA
TCGA-BH-A1EY-01	-0.427807	BRCA
TCGA-E2-A574-01	-0.939991	BRCA
TCGA-D8-A1JB-01	0.538982	BRCA
TCGA-D8-A27P-01	-0.779582	BRCA
TCGA-E9-A5FL-01	1.37702	BRCA
TCGA-LL-A5YM-01	0.919541	BRCA
TCGA-BH-A1FC-01	1.34661	BRCA
TCGA-XX-A89A-01	0.4013	BRCA
TCGA-GM-A2DL-01	-0.533364	BRCA
TCGA-E2-A1LH-11	-0.448594	BRCA
TCGA-BH-A18P-11	-1.98477	BRCA
TCGA-AO-A12E-01	-0.134204	BRCA
TCGA-AR-A24S-01	0.152124	BRCA
TCGA-BH-A0B3-11	-0.961159	BRCA
TCGA-E2-A15K-01	1.1058	BRCA
TCGA-AO-A12G-01	0.55358	BRCA
TCGA-BH-A0HA-01	0.465933	BRCA
TCGA-W8-A86G-01	-0.56634	BRCA
TCGA-E2-A153-01	0.0289291	BRCA
TCGA-AR-A24W-01	-1.3062	BRCA
TCGA-D8-A1JJ-01	-0.421071	BRCA
TCGA-AO-A03P-01	0.05677	BRCA
TCGA-E2-A158-01	-0.653206	BRCA
TCGA-A8-A079-01	0.832818	BRCA
TCGA-BH-A204-01	-2.31623	BRCA
TCGA-BH-A0B4-01	1.39334	BRCA
TCGA-AO-A03T-01	0.54039	BRCA
TCGA-E9-A1N6-01	0.625836	BRCA
TCGA-GM-A2DM-01	0.0685998	BRCA
TCGA-A2-A4RX-01	0.243348	BRCA
TCGA-E9-A1N9-11	-1.67549	BRCA
TCGA-D8-A27H-01	-1.5295	BRCA
TCGA-E9-A1NC-01	1.00535	BRCA
TCGA-A2-A3XS-01	0.431822	BRCA
TCGA-AR-A0TZ-01	-0.76682	BRCA
TCGA-AO-A0J7-01	-1.10049	BRCA
TCGA-D8-A1XY-01	-0.632937	BRCA
TCGA-BH-A0BM-11	-0.74425	BRCA
TCGA-A2-A0CK-01	0.468603	BRCA
TCGA-AC-A8OR-01	0.710814	BRCA
TCGA-BH-A0E1-11	-0.985283	BRCA
TCGA-A2-A0YH-01	0.569071	BRCA
TCGA-A2-A4S2-01	0.474964	BRCA
TCGA-AQ-A7U7-01	1.06304	BRCA
TCGA-E2-A10A-01	-0.975159	BRCA
TCGA-C8-A12P-01	0.275117	BRCA
TCGA-BH-A0BJ-11	-0.780771	BRCA
TCGA-GM-A5PX-01	0.213595	BRCA
TCGA-A7-A13F-01	-0.573966	BRCA
TCGA-D8-A1X9-01	-0.144021	BRCA
TCGA-AR-A1AN-01	-0.487756	BRCA
TCGA-D8-A1Y0-01	0.277842	BRCA
TCGA-EW-A1PG-01	-0.949138	BRCA
TCGA-AN-A0FN-01	0.469062	BRCA
TCGA-EW-A1PF-01	-0.554159	BRCA
TCGA-AO-A03L-01	0.176205	BRCA
TCGA-AN-A0FY-01	-0.351268	BRCA
TCGA-AC-A7VC-01	-1.34004	BRCA
TCGA-E9-A1R3-01	-0.172283	BRCA
TCGA-E2-A1IN-01	-0.408516	BRCA
TCGA-A2-A25E-01	-0.808032	BRCA
TCGA-EW-A1IY-01	-0.195187	BRCA
TCGA-B6-A0X4-01	-1.9184	BRCA
TCGA-D8-A1XQ-01	0.676639	BRCA
TCGA-A2-A0CL-01	1.50279	BRCA
TCGA-A7-A0CH-11	-0.540935	BRCA
TCGA-C8-A27A-01	-1.79093	BRCA
TCGA-E9-A1R7-01	-0.855452	BRCA
TCGA-E9-A249-01	0.468186	BRCA
TCGA-A8-A07P-01	0.42411	BRCA
TCGA-BH-A1F5-01	-1.96915	BRCA
TCGA-A7-A0DC-11	-1.83024	BRCA
TCGA-A8-A08F-01	0.961825	BRCA
TCGA-AC-A5XU-01	-0.727519	BRCA
TCGA-AN-A0XL-01	-0.953491	BRCA
TCGA-E9-A1ND-01	1.81226	BRCA
TCGA-AN-A03X-01	-0.922659	BRCA
TCGA-A8-A08R-01	0.366764	BRCA
TCGA-A2-A0YC-01	0.591277	BRCA
TCGA-GM-A2DC-01	0.330888	BRCA
TCGA-A2-A3XT-01	1.2221	BRCA
TCGA-AN-A04C-01	-0.456856	BRCA
TCGA-A2-A0YT-01	-0.252176	BRCA
TCGA-BH-A1EO-01	0.736532	BRCA
TCGA-E2-A107-01	-0.526933	BRCA
TCGA-BH-A203-11	-1.77813	BRCA
TCGA-A2-A04W-01	-0.685996	BRCA
TCGA-LD-A74U-01	-0.19454	BRCA
TCGA-B6-A0I5-01	0.492903	BRCA
TCGA-BH-A0RX-01	2.2741	BRCA
TCGA-BH-A0DV-01	-0.230008	BRCA
TCGA-GM-A2DO-01	1.77282	BRCA
TCGA-A2-A0T1-01	1.92447	BRCA
TCGA-BH-A1ET-01	-0.694819	BRCA
TCGA-BH-A0EI-01	-2.08348	BRCA
TCGA-E2-A15J-01	0.174601	BRCA
TCGA-BH-A18R-11	-1.47586	BRCA
TCGA-A1-A0SQ-01	-0.46477	BRCA
TCGA-AC-A2QJ-01	2.53631	BRCA
TCGA-A7-A26H-01	-0.146016	BRCA
TCGA-E2-A1IL-01	-0.827966	BRCA
TCGA-AN-A04D-01	-0.0413422	BRCA
TCGA-C8-A27B-01	1.5539	BRCA
TCGA-AN-A0AS-01	-1.07808	BRCA
TCGA-D8-A4Z1-01	-0.198067	BRCA
TCGA-A8-A06R-01	-0.272304	BRCA
TCGA-AO-A1KP-01	-1.72002	BRCA
TCGA-E9-A1RC-01	-0.865061	BRCA
TCGA-A2-A04N-01	-0.18116	BRCA
TCGA-BH-A8FY-01	1.02504	BRCA
TCGA-A8-A09V-01	-2.83572	BRCA
TCGA-GM-A3NY-01	-0.0946204	BRCA
TCGA-BH-A5J0-01	1.50569	BRCA
TCGA-B6-A0I6-01	-1.05187	BRCA
TCGA-AO-A0JI-01	-0.58478	BRCA
TCGA-BH-A1FJ-11	-1.41239	BRCA
TCGA-BH-A18I-01	-0.716625	BRCA
TCGA-AO-A0JC-01	1.48883	BRCA
TCGA-A8-A09Z-01	0.836399	BRCA
TCGA-E9-A1RH-01	-1.75105	BRCA
TCGA-GM-A2DH-01	-0.185113	BRCA
TCGA-BH-A1ES-01	-2.06898	BRCA
TCGA-PL-A8LY-01	0.633169	BRCA
TCGA-OL-A5RW-01	0.644549	BRCA
TCGA-BH-A18M-01	-0.118833	BRCA
TCGA-E2-A14R-01	0.65377	BRCA
TCGA-A8-A09M-01	1.19415	BRCA
TCGA-A1-A0SN-01	0.837152	BRCA
TCGA-BH-A18F-01	-0.534544	BRCA
TCGA-AR-A2LM-01	-0.988749	BRCA
TCGA-E2-A10C-01	1.77202	BRCA
TCGA-AR-A0TW-01	1.92242	BRCA
TCGA-BH-A0W5-01	-0.169546	BRCA
TCGA-AR-A24K-01	-0.452373	BRCA
TCGA-BH-A0HY-01	-0.119754	BRCA
TCGA-BH-A1FB-11	-0.609197	BRCA
TCGA-A2-A0EU-01	-0.621371	BRCA
TCGA-D8-A1XW-01	-0.0377486	BRCA
TCGA-AN-A0FL-01	-1.99606	BRCA
TCGA-PL-A8LZ-01	2.1021	BRCA
TCGA-LL-A5YP-01	1.33784	BRCA
TCGA-AC-A2BK-01	-0.733416	BRCA
TCGA-AC-A7VB-01	-0.595152	BRCA
TCGA-E2-A1IG-01	0.154584	BRCA
TCGA-AO-A0J2-01	0.891584	BRCA
TCGA-BH-A28Q-01	-0.492397	BRCA
TCGA-AC-A2FB-01	1.29337	BRCA
TCGA-BH-A0BS-11	-0.882565	BRCA
TCGA-C8-A12L-01	-0.367484	BRCA
TCGA-3C-AALK-01	-1.72617	BRCA
TCGA-E9-A1QZ-01	0.586511	BRCA
TCGA-AC-A5EH-01	1.06384	BRCA
TCGA-GM-A2D9-01	0.0737358	BRCA
TCGA-LD-A66U-01	1.63965	BRCA
TCGA-AO-A1KO-01	-1.5775	BRCA
TCGA-BH-A0DO-11	-1.20752	BRCA
TCGA-AR-A0TP-01	-1.6188	BRCA
TCGA-BH-A0DK-11	-1.28174	BRCA
TCGA-A8-A07I-01	0.593341	BRCA
TCGA-A2-A0EY-01	0.0316758	BRCA
TCGA-LL-A442-01	-0.228265	BRCA
TCGA-A8-A08I-01	1.70905	BRCA
TCGA-A8-A091-01	-1.29567	BRCA
TCGA-D8-A1XT-01	0.0907613	BRCA
TCGA-BH-A0DG-01	0.47028	BRCA
TCGA-AR-A2LL-01	-0.246401	BRCA
TCGA-4H-AAAK-01	0.0288349	BRCA
TCGA-3C-AALI-01	0.349416	BRCA
TCGA-A8-A08P-01	1.90647	BRCA
TCGA-D8-A1X8-01	0.588513	BRCA
TCGA-BH-A0E1-01	-0.351014	BRCA
TCGA-S3-A6ZG-01	0.607161	BRCA
TCGA-AO-A0J5-01	-1.35828	BRCA
TCGA-A2-A0EM-01	-0.605472	BRCA
TCGA-A8-A08T-01	-1.40029	BRCA
TCGA-S3-AA12-01	-0.883194	BRCA
TCGA-HN-A2NL-01	-0.793434	BRCA
TCGA-AO-A12A-01	-0.570656	BRCA
TCGA-A2-A0YM-01	1.53591	BRCA
TCGA-BH-A1FN-11	0.383897	BRCA
TCGA-E2-A9RU-01	-0.0300608	BRCA
TCGA-C8-A130-01	0.113639	BRCA
TCGA-E2-A1B4-01	-0.294582	BRCA
TCGA-LL-A73Z-01	0.919432	BRCA
TCGA-C8-A1HI-01	-0.209728	BRCA
TCGA-LL-A6FR-01	1.0722	BRCA
TCGA-PL-A8LV-01	0.264688	BRCA
TCGA-A8-A07E-01	-0.958923	BRCA
TCGA-E9-A247-01	-0.0620997	BRCA
TCGA-A2-A3XZ-01	1.48428	BRCA
TCGA-A8-A07F-01	-0.549245	BRCA
TCGA-B6-A0RN-01	-0.936243	BRCA
TCGA-LD-A7W5-01	0.783548	BRCA
TCGA-BH-A0BL-01	0.918831	BRCA
TCGA-AN-A0XV-01	0.00611377	BRCA
TCGA-A7-A4SB-01	-1.42434	BRCA
TCGA-AN-A0XU-01	0.489975	BRCA
TCGA-A7-A6VV-01	-0.107372	BRCA
TCGA-E2-A1LI-01	1.18198	BRCA
TCGA-B6-A0WS-01	0.781528	BRCA
TCGA-C8-A138-01	1.02561	BRCA
TCGA-A7-A426-01	-0.276077	BRCA
TCGA-A7-A56D-01	2.35615	BRCA
TCGA-A8-A07B-01	0.347424	BRCA
TCGA-A8-A086-01	-0.715576	BRCA
TCGA-BH-A1FU-01	0.232502	BRCA
TCGA-B6-A0RI-01	-0.481942	BRCA
TCGA-E2-A1B6-01	2.03199	BRCA
TCGA-E9-A1N4-01	-0.708899	BRCA
TCGA-OL-A66O-01	-0.0459024	BRCA
TCGA-A7-A6VY-01	1.65012	BRCA
TCGA-GM-A2DA-01	0.60798	BRCA
TCGA-B6-A0I1-01	1.4109	BRCA
TCGA-D8-A141-01	1.06979	BRCA
TCGA-BH-A1FG-11	-1.80378	BRCA
TCGA-BH-A0H9-01	-0.397648	BRCA
TCGA-BH-A18T-01	1.04623	BRCA
TCGA-BH-A0BD-01	0.486512	BRCA
TCGA-OL-A5RU-01	1.02525	BRCA
TCGA-C8-A12T-01	-0.025134	BRCA
TCGA-A7-A0DA-01	-1.6071	BRCA
TCGA-A2-A25C-01	-1.10085	BRCA
TCGA-E2-A14V-01	-0.318503	BRCA
TCGA-BH-A1F8-11	-0.345258	BRCA
TCGA-BH-A0BV-11	-1.39071	BRCA
TCGA-BH-A0HP-01	0.0611935	BRCA
TCGA-B6-A0I8-01	-1.25272	BRCA
TCGA-E2-A1L7-01	0.414369	BRCA
TCGA-E9-A1N8-01	-2.00955	BRCA
TCGA-A8-A085-01	0.974013	BRCA
TCGA-AR-A0U0-01	1.6616	BRCA
TCGA-BH-A0AU-11	-0.941701	BRCA
TCGA-A7-A0CE-01	-0.115617	BRCA
TCGA-C8-A12Y-01	0.515342	BRCA
TCGA-A7-A13G-11	-2.13182	BRCA
TCGA-AC-A2BM-01	-0.635425	BRCA
TCGA-BH-A0E0-01	-1.20952	BRCA
TCGA-E2-A15G-01	-0.0134498	BRCA
TCGA-D8-A146-01	-0.663657	BRCA
TCGA-C8-A12U-01	0.545251	BRCA
TCGA-B6-A0WT-01	-0.772452	BRCA
TCGA-D8-A27M-01	0.299818	BRCA
TCGA-A8-A081-01	0.397675	BRCA
TCGA-BH-A1ES-06	-1.2831	BRCA
TCGA-AO-A03O-01	0.421887	BRCA
TCGA-BH-A0H5-11	-1.29298	BRCA
TCGA-E2-A15L-01	-0.404505	BRCA
TCGA-E2-A15H-01	-0.488529	BRCA
TCGA-BH-A1EV-11	-0.689839	BRCA
TCGA-A8-A093-01	-0.423282	BRCA
TCGA-BH-A18S-01	-0.05475	BRCA
TCGA-AR-A1AO-01	1.3185	BRCA
TCGA-AC-A23G-01	0.152294	BRCA
TCGA-AR-A24Z-01	-0.509019	BRCA
TCGA-D8-A145-01	-1.00987	BRCA
TCGA-BH-A42V-01	0.0782133	BRCA
TCGA-D8-A1XB-01	-0.0566796	BRCA
TCGA-A2-A0YL-01	-0.304712	BRCA
TCGA-A7-A5ZX-01	-0.267016	BRCA
TCGA-EW-A1P7-01	1.33706	BRCA
TCGA-AR-A5QQ-01	2.37537	BRCA
TCGA-S3-AA15-01	2.02232	BRCA
TCGA-BH-A1FH-11	-0.0254529	BRCA
TCGA-E9-A1RI-11	-2.73235	BRCA
TCGA-AR-A24M-01	-0.726775	BRCA
TCGA-A2-A0EW-01	-0.170663	BRCA
TCGA-EW-A1J3-01	-0.707318	BRCA
TCGA-EW-A1P3-01	-0.0807187	BRCA
TCGA-BH-A1FD-01	-0.647971	BRCA
TCGA-EW-A424-01	-0.0812278	BRCA
TCGA-E2-A2P5-01	-0.0936444	BRCA
TCGA-A2-A259-01	-0.469717	BRCA
TCGA-E2-A1B1-01	0.101804	BRCA
TCGA-A7-A3J0-01	-0.236498	BRCA
TCGA-AR-A2LR-01	-0.885443	BRCA
TCGA-A2-A0ES-01	-0.603366	BRCA
TCGA-A7-A0D9-11	-1.48856	BRCA
TCGA-EW-A1P8-01	0.917506	BRCA
TCGA-AR-A0U4-01	0.176262	BRCA
TCGA-A8-A08C-01	0.239364	BRCA
TCGA-LL-A7T0-01	0.373927	BRCA
TCGA-A7-A13D-01	-2.63488	BRCA
TCGA-EW-A1OZ-01	0.390501	BRCA
TCGA-A2-A1FX-01	-0.294426	BRCA
TCGA-BH-A0B8-11	-2.32357	BRCA
TCGA-E2-A10F-01	-0.166672	BRCA
TCGA-A7-A4SD-01	1.52689	BRCA
TCGA-E2-A1B5-01	0.703081	BRCA
TCGA-BH-A0DE-01	-0.32118	BRCA
TCGA-AO-A0JM-01	-0.189586	BRCA
TCGA-E2-A14P-01	1.26919	BRCA
TCGA-E9-A227-01	0.160626	BRCA
TCGA-AR-A2LH-01	0.972822	BRCA
TCGA-A8-A07O-01	0.720852	BRCA
TCGA-A2-A0D3-01	0.0362666	BRCA
TCGA-E9-A1NG-11	-1.27968	BRCA
TCGA-AO-A0JA-01	-0.555525	BRCA
TCGA-A2-A4S0-01	0.0796651	BRCA
TCGA-E9-A1RB-11	-1.16449	BRCA
TCGA-B6-A0IE-01	-0.0939163	BRCA
TCGA-OL-A66J-01	-0.0665077	BRCA
TCGA-D8-A1JI-01	-0.173201	BRCA
TCGA-OL-A5RX-01	-0.204971	BRCA
TCGA-EW-A1OY-01	0.159816	BRCA
TCGA-AR-A5QM-01	0.321794	BRCA
TCGA-A2-A0CQ-01	0.136491	BRCA
TCGA-BH-A0BA-01	-0.964785	BRCA
TCGA-BH-A18L-11	-1.1161	BRCA
TCGA-D8-A27F-01	-0.894675	BRCA
TCGA-C8-A26Z-01	-1.45742	BRCA
TCGA-BH-A1EU-11	-1.58123	BRCA
TCGA-E2-A14S-01	0.859772	BRCA
TCGA-A8-A06O-01	0.0972884	BRCA
TCGA-D8-A1JM-01	-0.81118	BRCA
TCGA-C8-A1HO-01	-0.73599	BRCA
TCGA-E9-A228-01	-0.931917	BRCA
TCGA-E9-A1RA-01	-0.449881	BRCA
TCGA-V7-A7HQ-01	-0.691264	BRCA
TCGA-OL-A6VR-01	-0.52564	BRCA
TCGA-AR-A1AW-01	1.57708	BRCA
TCGA-AR-A1AY-01	-0.214289	BRCA
TCGA-BH-A0H6-01	-2.06526	BRCA
TCGA-EW-A1OV-01	1.65095	BRCA
TCGA-A2-A04U-01	-0.330702	BRCA
TCGA-D8-A1JF-01	-0.73452	BRCA
TCGA-OL-A6VQ-01	-1.76719	BRCA
TCGA-C8-A273-01	-0.230689	BRCA
TCGA-C8-A132-01	0.241867	BRCA
TCGA-BH-A0EE-01	0.0166218	BRCA
TCGA-B6-A0RQ-01	-0.609622	BRCA
TCGA-D8-A27W-01	0.535903	BRCA
TCGA-AR-A2LJ-01	1.84833	BRCA
TCGA-A8-A075-01	0.092736	BRCA
TCGA-A1-A0SD-01	-0.253607	BRCA
TCGA-A2-A3Y0-01	1.8194	BRCA
TCGA-EW-A6SD-01	0.851611	BRCA
TCGA-E2-A14W-01	1.02048	BRCA
TCGA-LQ-A4E4-01	-0.226583	BRCA
TCGA-AR-A256-01	0.160074	BRCA
TCGA-A2-A0T3-01	-0.581072	BRCA
TCGA-BH-A0HN-01	0.0789143	BRCA
TCGA-A7-A26G-01	-0.547378	BRCA
TCGA-AN-A0FV-01	-0.440135	BRCA
TCGA-A7-A0CD-01	-0.194473	BRCA
TCGA-BH-A208-01	-0.994053	BRCA
TCGA-BH-A1F6-01	0.596757	BRCA
TCGA-AR-A1AU-01	-0.799207	BRCA
TCGA-AR-A24X-01	-0.583968	BRCA
TCGA-B6-A0IO-01	-0.443829	BRCA
TCGA-E2-A1IE-01	-0.824587	BRCA
TCGA-AN-A0AJ-01	0.695257	BRCA
TCGA-AO-A128-01	1.49459	BRCA
TCGA-AR-A24T-01	-1.47674	BRCA
TCGA-A2-A0CT-01	0.0760967	BRCA
TCGA-BH-A1F2-01	-0.27069	BRCA
TCGA-BH-A0DZ-11	-0.0982127	BRCA
TCGA-E9-A1N5-11	-0.826961	BRCA
TCGA-D8-A1J9-01	0.53781	BRCA
TCGA-E2-A150-01	0.21135	BRCA
TCGA-AR-A251-01	-0.0846221	BRCA
TCGA-BH-A0B1-01	-0.189164	BRCA
TCGA-D8-A1JE-01	-0.26323	BRCA
TCGA-A2-A0CP-01	-0.544588	BRCA
TCGA-C8-A274-01	-0.783308	BRCA
TCGA-BH-A5IZ-01	0.118097	BRCA
TCGA-A8-A076-01	0.446184	BRCA
TCGA-B6-A40B-01	0.700585	BRCA
TCGA-AR-A0U2-01	-0.922221	BRCA
TCGA-B6-A0IH-01	-0.276836	BRCA
TCGA-D8-A27K-01	0.0977522	BRCA
TCGA-E9-A5FK-01	1.66172	BRCA
TCGA-EW-A1PB-01	2.57695	BRCA
TCGA-BH-A0E9-01	-0.945021	BRCA
TCGA-A1-A0SE-01	-0.529887	BRCA
TCGA-E9-A1NH-01	-0.341909	BRCA
TCGA-EW-A2FW-01	-0.767175	BRCA
TCGA-AO-A0JD-01	-0.694512	BRCA
TCGA-A7-A3IY-01	1.62877	BRCA
TCGA-AO-A0J8-01	0.508486	BRCA
TCGA-BH-A0DQ-11	-1.39382	BRCA
TCGA-A7-A3IZ-01	-1.43	BRCA
TCGA-A2-A1G0-01	-0.425053	BRCA
TCGA-D8-A1XZ-01	-0.515459	BRCA
TCGA-AR-A0TY-01	-1.2898	BRCA
TCGA-A2-A0SW-01	1.40607	BRCA
TCGA-BH-A18U-11	-0.985197	BRCA
TCGA-OL-A5DA-01	1.01224	BRCA
TCGA-A7-A5ZV-01	-0.163429	BRCA
TCGA-LL-A50Y-01	1.06121	BRCA
TCGA-BH-A0BP-01	-0.174328	BRCA
TCGA-AR-A1AK-01	0.845229	BRCA
TCGA-E9-A22G-01	0.602005	BRCA
TCGA-AC-A2QH-01	-3.5905	BRCA
TCGA-E2-A15M-11	-0.796447	BRCA
TCGA-LL-A441-01	0.822041	BRCA
TCGA-A8-A0A2-01	-0.0292313	BRCA
TCGA-E2-A576-01	1.15964	BRCA
TCGA-B6-A1KC-01	-1.81206	BRCA
TCGA-OL-A66N-01	0.773582	BRCA
TCGA-A2-A1FV-01	-2.55453	BRCA
TCGA-C8-A1HM-01	1.43994	BRCA
TCGA-D8-A1JT-01	-0.562078	BRCA
TCGA-A2-A04P-01	0.307313	BRCA
TCGA-BH-A0GY-01	0.886557	BRCA
TCGA-E2-A56Z-01	-0.587235	BRCA
TCGA-BH-A18Q-11	-1.70832	BRCA
TCGA-A7-A13E-01	-2.29271	BRCA
TCGA-E2-A1LS-01	-0.74569	BRCA
TCGA-A2-A0CX-01	0.775621	BRCA
TCGA-A8-A07S-01	-0.314644	BRCA
TCGA-BH-A1FM-01	-1.05034	BRCA
TCGA-AC-A2FF-11	-0.0343656	BRCA
TCGA-A1-A0SM-01	1.05466	BRCA
TCGA-AQ-A04H-01	-0.0633064	BRCA
TCGA-LL-A6FP-01	0.882408	BRCA
TCGA-A2-A0T5-01	-0.431817	BRCA
TCGA-A7-A4SF-01	1.08566	BRCA
TCGA-A2-A25B-01	-0.848593	BRCA
TCGA-E2-A1IO-01	-0.498849	BRCA
TCGA-A2-A3XW-01	1.73932	BRCA
TCGA-BH-A1FE-11	-1.56769	BRCA
TCGA-A1-A0SI-01	0.502765	BRCA
TCGA-B6-A0RP-01	1.18503	BRCA
TCGA-AQ-A04L-01	-0.833343	BRCA
TCGA-E2-A14N-01	0.433153	BRCA
TCGA-BH-A18V-11	0.327603	BRCA
TCGA-AN-A049-01	-0.0910944	BRCA
TCGA-A1-A0SB-01	-1.64258	BRCA
TCGA-BH-A0GZ-01	-0.545951	BRCA
TCGA-BH-A0BT-11	-1.10899	BRCA
TCGA-BH-A0C0-11	-1.17605	BRCA
TCGA-BH-A0DP-01	0.0952922	BRCA
TCGA-AC-A2QI-01	0.116846	BRCA
TCGA-BH-A0DT-11	-1.47035	BRCA
TCGA-5L-AAT1-01	1.61738	BRCA
TCGA-A8-A06N-01	0.101813	BRCA
TCGA-BH-A8G0-01	0.576216	BRCA
TCGA-A2-A0T6-01	-0.0152977	BRCA
TCGA-AN-A0FF-01	0.362605	BRCA
TCGA-E2-A15I-01	-0.404115	BRCA
TCGA-LL-A5YL-01	1.05008	BRCA
TCGA-C8-A26X-01	0.813353	BRCA
TCGA-AN-A0FD-01	0.668949	BRCA
TCGA-AN-A0AK-01	0.338014	BRCA
TCGA-D8-A1JS-01	0.310679	BRCA
TCGA-AO-A1KS-01	-1.66361	BRCA
TCGA-AR-A24U-01	0.847114	BRCA
TCGA-E2-A15E-06	0.601019	BRCA
TCGA-AR-A1AX-01	1.0738	BRCA
TCGA-GI-A2C8-11	-3.02179	BRCA
TCGA-BH-A0C3-01	-0.899064	BRCA
TCGA-AC-A62Y-01	0.67982	BRCA
TCGA-D8-A1JD-01	-0.276699	BRCA
TCGA-S3-AA0Z-01	-0.284886	BRCA
TCGA-BH-A0DL-11	-0.578842	BRCA
TCGA-BH-A18J-11	-0.992493	BRCA
TCGA-E9-A1N3-01	-1.50265	BRCA
TCGA-A2-A0T2-01	0.839881	BRCA
TCGA-BH-A0B5-01	0.0600089	BRCA
TCGA-LL-A9Q3-01	0.832552	BRCA
TCGA-BH-A18N-01	-0.347507	BRCA
TCGA-D8-A27R-01	0.604954	BRCA
TCGA-AO-A0J9-01	0.208357	BRCA
TCGA-E9-A1N5-01	-0.0965361	BRCA
TCGA-BH-A209-01	1.64264	BRCA
TCGA-E2-A1AZ-01	0.659161	BRCA
TCGA-AN-A0FK-01	0.165776	BRCA
TCGA-A2-A0YI-01	0.336648	BRCA
TCGA-D8-A1XO-01	-0.0721528	BRCA
TCGA-BH-A1FR-11	-0.255847	BRCA
TCGA-D8-A27G-01	0.46962	BRCA
TCGA-AR-A0TT-01	1.53288	BRCA
TCGA-A8-A0A4-01	-1.25566	BRCA
TCGA-D8-A1X7-01	-0.351085	BRCA
TCGA-BH-A0BC-11	-0.562515	BRCA
TCGA-AC-A3OD-01	-0.802708	BRCA
TCGA-E2-A1LA-01	1.16689	BRCA
TCGA-A8-A095-01	-0.105754	BRCA
TCGA-D8-A143-01	-0.154237	BRCA
TCGA-A2-A0YE-01	-0.617245	BRCA
TCGA-A2-A0D2-01	0.550829	BRCA
TCGA-AC-A3YI-01	0.227666	BRCA
TCGA-A8-A07Z-01	0.802044	BRCA
TCGA-AN-A0FT-01	0.192998	BRCA
TCGA-A2-A0YF-01	-0.0672438	BRCA
TCGA-BH-A0DS-01	-0.332565	BRCA
TCGA-E9-A1R5-01	-0.676312	BRCA
TCGA-E9-A243-01	1.45515	BRCA
TCGA-A2-A25D-01	0.745473	BRCA
TCGA-E2-A159-01	1.03929	BRCA
TCGA-A8-A0A7-01	1.50675	BRCA
TCGA-B6-A0X5-01	0.289657	BRCA
TCGA-BH-A18K-11	-1.78571	BRCA
TCGA-B6-A0RE-01	0.644431	BRCA
TCGA-A2-A0CY-01	-1.24965	BRCA
TCGA-JL-A3YX-01	-0.308873	BRCA
TCGA-AC-A3QP-01	0.98367	BRCA
TCGA-EW-A1PH-01	0.957037	BRCA
TCGA-BH-A0DH-01	-0.088924	BRCA
TCGA-E9-A22H-01	-0.461933	BRCA
TCGA-D8-A3Z6-01	-0.0226118	BRCA
TCGA-E2-A155-01	-0.10828	BRCA
TCGA-E2-A1IG-11	-1.4854	BRCA
TCGA-B6-A0X1-01	1.13997	BRCA
TCGA-PE-A5DE-01	1.44579	BRCA
TCGA-A8-A07U-01	1.03829	BRCA
TCGA-A1-A0SP-01	0.673302	BRCA
TCGA-S3-A6ZH-01	-0.0878422	BRCA
TCGA-A2-A3XU-01	-0.166775	BRCA
TCGA-BH-A0DG-11	-1.20085	BRCA
TCGA-A1-A0SH-01	-0.868175	BRCA
TCGA-E2-A1LB-01	-0.621345	BRCA
TCGA-BH-A0AV-01	-0.451831	BRCA
TCGA-A2-A0D0-01	1.29063	BRCA
TCGA-A8-A08S-01	-0.724191	BRCA
TCGA-EW-A2FR-01	-0.231906	BRCA
TCGA-C8-A133-01	0.503738	BRCA
TCGA-A2-A3XY-01	1.14217	BRCA
TCGA-EW-A3E8-01	0.89632	BRCA
TCGA-A2-A0SU-01	-0.571584	BRCA
TCGA-C8-A1HE-01	-0.235459	BRCA
TCGA-B6-A0RM-01	-1.32257	BRCA
TCGA-AQ-A0Y5-01	-1.21882	BRCA
TCGA-BH-A1FM-11	-1.4653	BRCA
TCGA-5L-AAT0-01	0.86638	BRCA
TCGA-AR-A1AI-01	1.05932	BRCA
TCGA-D8-A3Z5-01	-0.521883	BRCA
TCGA-GM-A2DN-01	0.572754	BRCA
TCGA-B6-A1KI-01	-0.429203	BRCA
TCGA-BH-A1FC-11	0.0928552	BRCA
TCGA-BH-A0BO-01	-0.373109	BRCA
TCGA-E2-A152-01	0.654473	BRCA
TCGA-A8-A06T-01	0.595888	BRCA
TCGA-AC-A2FE-01	1.08381	BRCA
TCGA-LL-A6FQ-01	0.972849	BRCA
TCGA-E9-A248-01	0.544125	BRCA
TCGA-A7-A26I-01	-1.49366	BRCA
TCGA-C8-A12Q-01	1.23313	BRCA
TCGA-BH-A0HU-01	0.804416	BRCA
TCGA-BH-A0H7-11	-0.0699481	BRCA
TCGA-AR-A24V-01	-0.425242	BRCA
TCGA-B6-A0WX-01	-0.0033295	BRCA
TCGA-D8-A1Y2-01	1.48497	BRCA
TCGA-AN-A0AR-01	-0.403187	BRCA
TCGA-A8-A06P-01	-0.185611	BRCA
TCGA-AC-A62X-01	0.519438	BRCA
TCGA-AC-A2FO-01	-0.00146373	BRCA
TCGA-BH-A0AY-11	-1.34378	BRCA
TCGA-B6-A3ZX-01	1.32589	BRCA
TCGA-BH-A1F0-11	-1.00744	BRCA
TCGA-D8-A142-01	-0.204933	BRCA
TCGA-LD-A9QF-01	1.82775	BRCA
TCGA-BH-A0DX-01	0.584225	BRCA
TCGA-B6-A0RU-01	-0.376661	BRCA
TCGA-EW-A1J6-01	1.41105	BRCA
TCGA-E9-A22B-01	-0.71532	BRCA
TCGA-E2-A106-01	-1.30893	BRCA
TCGA-A1-A0SF-01	0.303859	BRCA
TCGA-OL-A5RV-01	-0.850004	BRCA
TCGA-E2-A1BC-01	-1.34897	BRCA
TCGA-BH-A0W7-01	1.37353	BRCA
TCGA-E2-A15C-01	-0.516386	BRCA
TCGA-AR-A0U3-01	-1.00043	BRCA
TCGA-BH-A0HW-01	-1.13298	BRCA
TCGA-GM-A3NW-01	-0.529956	BRCA
TCGA-D8-A1XU-01	0.184444	BRCA
TCGA-BH-A0B3-01	1.62634	BRCA
TCGA-PL-A8LX-01	0.449814	BRCA
TCGA-B6-A0IN-01	0.411072	BRCA
TCGA-A2-A3KC-01	-0.582306	BRCA
TCGA-BH-A0HX-01	-0.212781	BRCA
TCGA-A8-A097-01	-0.433331	BRCA
TCGA-E9-A22E-01	-0.229086	BRCA
TCGA-B6-A0IP-01	0.347199	BRCA
TCGA-A2-A04X-01	1.96002	BRCA
TCGA-E2-A1IU-01	-0.00884137	BRCA
TCGA-AC-A3BB-01	0.688148	BRCA
TCGA-A8-A094-01	0.807319	BRCA
TCGA-C8-A12Z-01	-0.838182	BRCA
TCGA-D8-A1XF-01	-0.647593	BRCA
TCGA-BH-A1EN-11	-0.914073	BRCA
TCGA-A8-A082-01	-0.70554	BRCA
TCGA-AR-A1AL-01	-0.642109	BRCA
TCGA-3C-AALJ-01	0.475493	BRCA
TCGA-LL-A440-01	0.190872	BRCA
TCGA-AR-A2LK-01	0.213938	BRCA
TCGA-A8-A07G-01	-1.07483	BRCA
TCGA-AO-A12H-01	0.597515	BRCA
TCGA-BH-A0DI-01	-0.0434998	BRCA
TCGA-BH-A0B7-01	0.982238	BRCA
TCGA-E9-A1RC-11	-1.77323	BRCA
TCGA-A2-A0EX-01	-0.0502554	BRCA
TCGA-D8-A1XR-01	-1.04702	BRCA
TCGA-AR-A0TQ-01	-0.0610685	BRCA
TCGA-BH-A18P-01	-0.237223	BRCA
TCGA-E2-A15O-01	-0.319263	BRCA
TCGA-AO-A12C-01	-1.02513	BRCA
TCGA-OL-A97C-01	-1.42683	BRCA
TCGA-E2-A15K-11	0.271441	BRCA
TCGA-BH-A18G-01	0.431477	BRCA
TCGA-B6-A0IA-01	-0.863324	BRCA
TCGA-A8-A090-01	1.10092	BRCA
TCGA-5T-A9QA-01	-0.0591236	BRCA
TCGA-AN-A0XT-01	-1.69328	BRCA
TCGA-AO-A0J4-01	-0.0565317	BRCA
TCGA-A2-A0YK-01	0.18093	BRCA
TCGA-A8-A09K-01	-0.244844	BRCA
TCGA-EK-A2RE-01	-0.22266	CESC
TCGA-IR-A3L7-01	-1.95816	CESC
TCGA-Q1-A73Q-01	-0.782272	CESC
TCGA-C5-A1MF-01	1.25552	CESC
TCGA-ZJ-A8QQ-01	-0.498035	CESC
TCGA-EX-A3L1-01	0.495303	CESC
TCGA-JW-A5VI-01	0.599998	CESC
TCGA-EA-A1QT-01	0.40346	CESC
TCGA-HM-A6W2-06	-1.21986	CESC
TCGA-UC-A7PG-01	0.106563	CESC
TCGA-EA-A97N-01	-1.14075	CESC
TCGA-EA-A3QD-01	1.17701	CESC
TCGA-C5-A1ME-01	0.636342	CESC
TCGA-C5-A8YR-01	0.261137	CESC
TCGA-FU-A40J-01	-0.116183	CESC
TCGA-VS-A9V5-01	-1.47203	CESC
TCGA-MY-A913-01	0.188834	CESC
TCGA-VS-A8Q9-01	-0.0693444	CESC
TCGA-DS-A0VL-01	0.403741	CESC
TCGA-VS-A9UU-01	-0.286866	CESC
TCGA-ZJ-AAXN-01	0.334303	CESC
TCGA-VS-A9U6-01	0.215566	CESC
TCGA-C5-A2LX-01	1.07013	CESC
TCGA-C5-A1M8-01	-1.02504	CESC
TCGA-C5-A7CJ-01	-0.208936	CESC
TCGA-GH-A9DA-01	0.143215	CESC
TCGA-MY-A5BF-11	-1.27694	CESC
TCGA-EA-A5O9-01	1.09245	CESC
TCGA-Q1-A73P-01	-0.746292	CESC
TCGA-C5-A8XK-01	0.656587	CESC
TCGA-C5-A907-01	1.29116	CESC
TCGA-VS-A9UD-01	2.05481	CESC
TCGA-C5-A7CM-01	-0.60117	CESC
TCGA-VS-A9V2-01	0.310977	CESC
TCGA-VS-A94Y-01	0.577997	CESC
TCGA-C5-A8ZZ-01	-1.94547	CESC
TCGA-VS-A9UJ-01	-0.579563	CESC
TCGA-ZJ-AAXI-01	0.287316	CESC
TCGA-Q1-A6DT-01	-0.145332	CESC
TCGA-VS-A9UQ-01	-1.16153	CESC
TCGA-VS-A8EG-01	-0.511848	CESC
TCGA-EX-A69L-01	1.37564	CESC
TCGA-Q1-A73O-01	-0.226699	CESC
TCGA-VS-A8QC-01	-0.789	CESC
TCGA-EA-A5ZE-01	-0.0319958	CESC
TCGA-ZJ-A8QO-01	-0.258252	CESC
TCGA-JX-A5QV-01	0.550633	CESC
TCGA-EK-A2GZ-01	0.779151	CESC
TCGA-EK-A2R9-01	0.634039	CESC
TCGA-IR-A3LL-01	0.697412	CESC
TCGA-C5-A1M5-01	0.32049	CESC
TCGA-C5-A7X8-01	-0.799752	CESC
TCGA-EA-A3HS-01	-0.717	CESC
TCGA-IR-A3LH-01	1.47545	CESC
TCGA-C5-A1M9-01	-1.01192	CESC
TCGA-DG-A2KJ-01	1.77411	CESC
TCGA-Q1-A5R3-01	1.20428	CESC
TCGA-HG-A2PA-01	0.0498565	CESC
TCGA-EA-A50E-01	-0.785826	CESC
TCGA-EA-A556-01	-1.21996	CESC
TCGA-VS-A9V3-01	1.12174	CESC
TCGA-UC-A7PG-06	0.783032	CESC
TCGA-VS-A9UH-01	2.03758	CESC
TCGA-JX-A3PZ-01	1.07498	CESC
TCGA-C5-A1MP-01	0.354942	CESC
TCGA-MU-A5YI-01	-0.597366	CESC
TCGA-VS-A8QA-01	-0.482044	CESC
TCGA-FU-A5XV-01	0.615988	CESC
TCGA-EX-A8YF-01	0.148358	CESC
TCGA-ZJ-A8QR-01	0.555828	CESC
TCGA-IR-A3LB-01	0.00369038	CESC
TCGA-EK-A2PI-01	-0.855562	CESC
TCGA-HM-A6W2-01	0.282707	CESC
TCGA-EK-A2IR-01	-2.79866	CESC
TCGA-IR-A3LF-01	-0.4931	CESC
TCGA-HM-A4S6-01	-0.287958	CESC
TCGA-VS-A8QF-01	0.482004	CESC
TCGA-VS-AA62-01	0.848936	CESC
TCGA-C5-A7UE-01	-0.268399	CESC
TCGA-DS-A5RQ-01	1.06143	CESC
TCGA-BI-A20A-01	0.372099	CESC
TCGA-EA-A3HU-01	0.761522	CESC
TCGA-EK-A2RM-01	0.542568	CESC
TCGA-DG-A2KK-01	0.142011	CESC
TCGA-C5-A1MI-01	-0.835682	CESC
TCGA-JW-A852-01	1.1924	CESC
TCGA-EK-A2RA-01	1.60242	CESC
TCGA-EK-A2RB-01	0.00237483	CESC
TCGA-C5-A1MJ-01	0.0965735	CESC
TCGA-MY-A5BE-01	1.97444	CESC
TCGA-C5-A1BE-01	-0.76837	CESC
TCGA-ZJ-AAXT-01	-0.663042	CESC
TCGA-LP-A7HU-01	-0.208058	CESC
TCGA-2W-A8YY-01	-0.072444	CESC
TCGA-EA-A411-01	-0.476575	CESC
TCGA-C5-A1MN-01	0.224104	CESC
TCGA-C5-A2M2-01	-1.05696	CESC
TCGA-EK-A2PK-01	1.59403	CESC
TCGA-EA-A410-01	0.101614	CESC
TCGA-VS-A952-01	-2.14197	CESC
TCGA-EK-A2IP-01	-0.886465	CESC
TCGA-EK-A2PG-01	-1.32684	CESC
TCGA-FU-A3YQ-01	0.920515	CESC
TCGA-DS-A1OB-01	-0.795513	CESC
TCGA-VS-A959-01	0.861873	CESC
TCGA-EK-A2R7-01	-0.144278	CESC
TCGA-JW-A5VJ-01	-1.3815	CESC
TCGA-C5-A7UH-01	-0.386464	CESC
TCGA-MA-AA3Z-01	0.750394	CESC
TCGA-VS-A9UR-01	-0.17331	CESC
TCGA-EK-A3GN-01	-0.56348	CESC
[truncated: 8,535 more rows]
